# Supplementary material for: Marine microalgae co-cultured with floc-forming bacterium: Insight into growth and lipid productivity
Source: PeerJ. 2021 Apr 23;9:e11217. doi: 10.7717/peerj.11217 (PMC8074844; doi:10.7717/peerj.11217)
Supplement: Supplemental Information 1 [file peerj-09-11217-s001.xlsx]

## Sheet: Sheet1
Biofloc sample 500mL(n=4)
				TSS (20mL/500mL)
Biofloc volume(mL)	pH	Salinity(ppt)		Before(g)	After(g)
1.5	8.25	28.5		0.0895	0.0924	0.145
0.5	8	26.5		0.0952	0.0974	0.11
1	7.96	27.5		0.0895	0.0921	0.13
0.8	7.89	26.5		0.0932	0.0962	0.15
Average	8.025	27.25			Average	0.13375
STD	0.156738	0.957427			STD	0.0179699
665	645	630	Chl a
0.116	0.09	0.086	1.21566
0.125	0.099	0.099	1.30645
0.185	0.168	0.169	1.90226
0.067	0.048	0.047	0.70774
		Averge	1.28303
		STD	0.489725

## Sheet: Sheet3
DNA concentration and purity
Sample	Conc	Purity	AVG Conc.	AVG Purity
DIA_1	140.7	1.79	163.7	1.7555
DIA_2	186.7	1.721	32.5269	0.0487904
CIR1_1	186.7	1.821	153.35	1.8055
CIR1_2	120	1.79	47.164	0.0219203
CIR2_1	137.21	1.791	137.205	1.7925
CIR2_2	137.2	1.794	0.00707107	0.00212132
