# Supplementary material for: Marine microalgae co-cultured with floc-forming bacterium: Insight into growth and lipid productivity
Source: PeerJ. 2021 Apr 23;9:e11217. doi: 10.7717/peerj.11217 (PMC8074844; doi:10.7717/peerj.11217)
Supplement: Supplemental Information 2 [file peerj-09-11217-s002.xlsx]

## Sheet: biomass(DW)
Dry weight
	Pure		Co-culture
Sample	dry weight	STD	dry weight	STD
T. weissflogii	515	63.3167	680	32.92
Chlamydomonas sp.	667.667	92.8134	555.333	8.32666
Chlorella sp.	736.333	61.5007	814.667	75.295
Sample	DF	F	P
DIA	1	5.09	0.037
	18
	19
Chlamydomonas sp.	1	1.11	0.307
	18
	19
Chlorella sp.	1	4.85	0.041
	18
	19
	Biomass productivity (mg/L/day)
Sample	Pure	STD	Co-culture	STD
T.weissflogii	54.4667	12.2317	109.92	4.73
Chlamydomonas sp.	85.7333	18.4925	68.5833	3.10577
Chlorella sp.	100.467	15.3132	130.917	20.2891
T.weissflogii
Day	Axenic	STD	Co-culture	STD
0	242.667	3.05505	240.333	14.2244
1	294.267	3.78065	452	4
2	524	44	560.667	115.487
3	515	29	586.667	90.7377
4	539.333	105.097	680	32.9242
5	515	63.3167	696.667	46.6512
6	541	5	758.667	44.3772
7	551.667	21.7792	786.667	77.7003
8	526.667	30.2875	770.267	30.9143
Chlamydomonas
Day	Axenic	STD	Co-culture	STD
0	239	5	281	5
1	429	31.0966	348	14
2	465	39.2301	420	4
3	442.667	16.0416	501	17.5784
4	542.333	49.7427	555.333	8.32666
5	667.667	92.8134	694	8.7178
6	616.333	85.2193	763.333	13.3167
7	578.667	23.8607	879.333	42.1584
8	598.667	97.7616	869	17
C.vulgaris
Day	Axenic	STD	Co-culture	STD
0	234	16	291	7
1	301.333	33.0051	590	30
2	312	15.0997	714	26
3	423	7	740	56.7098
4	544	50	814.667	75.295
5	736.333	61.5007	866.667	43.1432
6	854	4	1130.27	30.715
7	920	8	1154.67	19.7315
8	915.667	31.5331	1128	89.0169

## Sheet: Pure
Sample(A-B)mg	0	1	2	3	4	5	6	7	8	9				0.0946	0.1255	30.9
T.weissflogii_1	12	14.5	26.2	27.2	20.9	22.1	26.8	26.7	24.6					0.0954	0.1255	30.1
T.weissflogii_2	12.3	14.86	24	24.3	30.1	27.4	27.3	28.8	27.4					0.0953	0.1377	42.4
T.weissflogii_3	12.1	14.78	28.4	25.75	29.9	27.75	27.05	27.25	27					0.0956	0.1348	39.2
														0.0954	0.138	42.6
Chlamydomonas_1	12.2	22.8	25.5	21.3	24.5	36.5	34.5	29.3	31	30.2				0.0951	0.1387	43.6
Chlamydomonas_2	11.7	21.8	21.9	22.2	27.4	35.6	31.8	29.9	34.2	31.3
Chlamydomonas_3	11.95	19.75	22.35	22.9	29.45	28.05	26.15	27.6	24.6	24.75
C. vulgaris_1	10.9	13.7	16.4	20.8	24.7	39	42.5	45.6	44.4	41.3
C. vulgaris_2	12.5	14.6	14.9	21.5	29.7	33.3	42.9	46.4	47.5	41.2
C. vulgaris_3	11.7	16.9	15.5	21.15	27.2	38.15	42.7	46	45.45	41.25
Sample(dw mg/L)	0	1	2	3	4	5	6	7	8	9
T.weissflogii	240	290	524	544	418	442	536	534	492
	246	297.2	480	486	602	548	546	576	548
	242	295.6	568	515	598	555	541	545	540
Average	242.667	294.267	524	515	539.333	515	541	551.667	526.667
STD	3.05505	3.78065	44	29	105.097	63.3167	5	21.7792	30.2875
Sample(dw mg/L)	0	1	2	3	4	5	6	7	8	9
Chlamydomonas	244	456	510	426	490	730	690	586	620	604
	234	436	438	444	548	712	636	598	684	626
	239	395	447	458	589	561	523	552	492	495
Average	239	429	465	442.667	542.333	667.667	616.333	578.667	598.667	575
STD	5	31.0966	39.2301	16.0416	49.7427	92.8134	85.2193	23.8607	97.7616	70.1498
Sample(dw mg/L)	0	1	2	3	4	5	6	7	8	9
C. vulgaris	218	274	328	416	494	780	850	912	888	826
	250	292	298	430	594	666	858	928	950	824
	234	338	310	423	544	763	854	920	909	825
Average	234	301.333	312	423	544	736.333	854	920	915.667	825
STD	16	33.0051	15.0997	7	50	61.5007	4	8	31.5331	1
Sample	Biomass productivity		Average	STD
T.weissflogii	40.4
	60.4		54.4667	12.2317
	62.6
Chlamydomonas	97.2
	95.6		85.7333	18.4925
	64.4
C. vulgaris	112.4
	83.2		100.467	15.3132
	105.8

## Sheet: Co-culture
Sample (A-B)(mg)	0	1	2	3	4	5	6	7	8
T.weissflogii_1	11.2	22.8	24.6	27.5	32.1	34.4	35.9	38.4	40
T.weissflogii_2	12.5	22.4	24.8	34.5	34.9	35	40.3	43.6	42.7
T.weissflogii_3	12.35	22.6	34.7	26	35	35.1	37.6	36	40.2
Chlamydomonas_1	14.3	16.7	20.8	25.4	27.3	34.4	38.6	42.8	42.6
Chlamydomonas_2	13.8	18.1	21.2	25.7	27.9	34.5	37.4	46.4	44.3
Chlamydomonas_3	14.05	17.4	21	24.05	28.1	35.2	38.5	42.7	43.45
C.vulgaris_1	14.9	28	34.4	33.8	36.4	41.8	55.3	58.2	59.5
C.vulgaris_2	14.2	31	37	38	42.6	42.4	56	56.6	51.3
C.vulgaris_3	14.55	29.5	35.7	39.2	43.2	45.8	58.24	58.4	58.4
Sample(dw mg/L)	0	1	2	3	4	5	6	7	8
T.weissflogii	224	456	492	550	642	688	718	768	757
	250	448	496	690	698	700	806	872	805.6
	247	452	694	520	700	702	752	720	748.2
Average	240.333	452	560.667	586.667	680	696.667	758.667	786.667	770.267
STD	14.2244	4	115.487	90.7377	32.9242	46.6512	44.3772	77.7003	30.9143
Sample(dw mg/L)	0	1	2	3	4	5	6	7	8
Chlamydomonas	286	334	416	508	546	688	772	856	852
	276	362	424	514	558	690	748	928	886
	281	348	420	481	562	704	770	854	869
Average	281	348	420	501	555.333	694	763.333	879.333	869
STD	5	14	4	17.5784	8.32666	8.7178	13.3167	42.1584	17
Sample(dw mg/L)	0	1	2	3	4	5	6	7	8
C.vulgaris	298	560	688	676	728	836	1106	1164	1190
	284	620	740	760	852	848	1120	1132	1026
	291	590	714	784	864	916	1164.8	1168	1168
Average	291	590	714	740	814.667	866.667	1130.27	1154.67	1128
STD	7	30	26	56.7098	75.295	43.1432	30.715	19.7315	89.0169
Sample (4-d)	Biomass productivity		Average	STD
T.weissflogii	104.5
	112		109.917	4.73242
	113.25
Chlamydomonas	65
	70.5		68.5833	3.10577
	70.25
C.vulgaris	107.5
	142		130.917	20.2891
	143.25
Sample	DW (mg/L)	day	DW (mg/L)	day	Productivity max (mg/L.day)
T.weissflogii	688	5	224	0	92.8
	700	5	250	0	90
	702	5	247	0	91
					91.2667	1.41892
Chlamydomonas	772	6	286	0	81
	748	6	276	0	78.6667
	770	6	281	0	81.5
					80.3889	1.5123
C.vulgaris	1164	7	298	0	123.714
	1132	7	284	0	121.143
	1168	7	291	0	125.286
					123.381	2.09145
