# Supplementary material for: Marine microalgae co-cultured with floc-forming bacterium: Insight into growth and lipid productivity
Source: PeerJ. 2021 Apr 23;9:e11217. doi: 10.7717/peerj.11217 (PMC8074844; doi:10.7717/peerj.11217)
Supplement: Supplemental Information 3 [file peerj-09-11217-s003.xlsx]

## Sheet: TW
Axenic T. weissflogii-Rep1
Fatty acids	AS	AIS	WIS (g/mol)	WS (g/mol)	R	IS (mg)	Biomass (g)	FA (mg/g)	Lipid (%)	FA (%)				SFA
C4:0	4.14	4.14	102.135	102.135	1	0.102135	0.515	0.19832	0.0449	0.00890459				MUFA
C8:0	1.21	4.14	102.135	158.243	0.188641	0.102135	0.515	0.307268	0.0449	0.0137963				PUFA
C12:0	ND	4.14	102.135	214.351	#VALUE!	0.102135	0.515	#VALUE!	0.0449
C14:0	ND	4.14	102.135	270.459	#VALUE!	0.102135	0.515	#VALUE!	0.0449
C14:1	2.51	4.14	102.135	240.405	0.257575	0.102135	0.515	0.466806	0.0449	0.0209596
C15:0	ND	4.14	102.135	256.432	#VALUE!	0.102135	0.515	#VALUE!	0.0449
C15.1	33.64	4.14	102.135	346.5	2.39512	0.102135	0.515	0.672816	0.0449	0.0302094
C16:0	1.16	4.14	102.135	270.459	0.105811	0.102135	0.515	0.525163	0.0449	0.0235798
C16:1	ND	4.14	102.135	268.459	#VALUE!	0.102135	0.515	#VALUE!	0.0449
C18:0	ND	4.14	102.135	298.513	#VALUE!	0.102135	0.515	#VALUE!	0.0449
C18:1n9	ND	4.14	102.135	282.46	#VALUE!	0.102135	0.515	#VALUE!	0.0449
C18:2n6	0.44	4.14	102.135	294.513	0.0368572	0.102135	0.515	0.57187	0.0449	0.025677
C18:3n6	ND	4.14	102.135	278.43	#VALUE!	0.102135	0.515	#VALUE!	0.0449
C18:3n3	ND	4.14	102.135	292.513	#VALUE!	0.102135	0.515	#VALUE!	0.0449
C20:0	ND	4.14	102.135	326.567	#VALUE!	0.102135	0.515	#VALUE!	0.0449
C20:1	11.71	4.14	102.135	324.567	0.890075	0.102135	0.515	0.630227	0.0449	0.0282972
C20:3n3	ND	4.14	102.135	320.567	#VALUE!	0.102135	0.515	#VALUE!	0.0449
C20:4N6	1.99	4.14	102.135	318.567	0.154108	0.102135	0.515	0.618577	0.0449	0.0277741
C20:5n3	3.36	4.14	102.135	316.567	0.261847	0.102135	0.515	0.614693	0.0449	0.0275997
C22:0	5.91	4.14	102.135	354.621	0.411147	0.102135	0.515	0.688584	0.0449	0.0309174
C22:1N9	7.03	4.14	102.135	352.621	0.491837	0.102135	0.515	0.684701	0.0449	0.0307431
C22:6N3	ND	4.14	102.135	342.515	#VALUE!	0.102135	0.515	#VALUE!	0.0449
C24:1	26.9	4.14	102.135	380.675	1.7433	0.102135	0.515	0.739175	0.0449	0.0331889
	100									0.301647			Parameter	Concentration (based on total lipid, %)
Axenic T. weissflogii-Rep2													Fatty acids	Axenic		Co-culture
Fatty acids	AS	AIS	WIS (g/mol)	WS (g/mol)	R	IS (mg)	Biomass (g)	FA (mg/g)	Lipid (%)	FA (%)			C4:0	0.89		0.89
C4:0	0.63	0.28	102.135	102.135	2.25	0.102135	0.515	0.19832	0.0449	0.00890459			C14:0	nd		2.32
C8:0	ND	0.28	102.135	158.243	#VALUE!	0.102135	0.515	#VALUE!	0.0449				C16:0	2.36		2.32
C12:0	ND	0.28	102.135	214.351	#VALUE!	0.102135	0.515	#VALUE!	0.0449				C18:0	nd		nd
C14:0	ND	0.28	102.135	270.459	#VALUE!	0.102135	0.515	#VALUE!	0.0449				C20:0	nd		2.8
C14:1	9.43	0.28	102.135	240.405	14.3082	0.102135	0.515	0.466806	0.0449	0.0209596			C22:0	3.09		3.04
C15:0	ND	0.28	102.135	256.432	#VALUE!	0.102135	0.515	#VALUE!	0.0449				Total SFA	6.34	1.35724	11.37	1.191
C15.1	5.62	0.28	102.135	346.5	5.91629	0.102135	0.515	0.672816	0.0449	0.0302094
C16:0	ND	0.28	102.135	270.459	#VALUE!	0.102135	0.515	#VALUE!	0.0449				C14:1	2.1		2.06
C16:1	0.83	0.28	102.135	268.459	1.12776	0.102135	0.515	0.52128	0.0449	0.0234055			C15:1	3.02		2.97
C18:0	ND	0.28	102.135	298.513	#VALUE!	0.102135	0.515	#VALUE!	0.0449				C16:1	2.34		2.3
C18:1n9	0.71	0.28	102.135	282.46	0.916892	0.102135	0.515	0.548466	0.0449	0.0246261			C18:1n-9	2.46		2.42
C18:2n6	ND	0.28	102.135	294.513	#VALUE!	0.102135	0.515	#VALUE!	0.0449				C22:1n-9	3.07		3.03
C18:3n6	0.52	0.28	102.135	278.43	0.681246	0.102135	0.515	0.540641	0.0449	0.0242748			C24:1	3.32		3.27
C18:3n3	0.41	0.28	102.135	292.513	0.511276	0.102135	0.515	0.567986	0.0449	0.0255026			Total MUFA	16.31	0.483505	16.05	0.479781
C20:0	ND	0.28	102.135	326.567	#VALUE!	0.102135	0.515	#VALUE!	0.0449
C20:1	33.15	0.28	102.135	324.567	37.256	0.102135	0.515	0.630227	0.0449	0.0282972			C18:2n6	2.57		2.53
C20:3n3	ND	0.28	102.135	320.567	#VALUE!	0.102135	0.515	#VALUE!	0.0449				C18:3n6	2.43		2.39
C20:4N6	2.32	0.28	102.135	318.567	2.65646	0.102135	0.515	0.618577	0.0449	0.0277741			C18:3n3	2.55		2.51
C20:5n3	13.33	0.28	102.135	316.567	15.3596	0.102135	0.515	0.614693	0.0449	0.0275997			C20:3n3	nd		nd
C22:0	ND	0.28	102.135	354.621	#VALUE!	0.102135	0.515	#VALUE!	0.0449				C20:4N6	2.78		2.73
C22:1N9	12.52	0.28	102.135	352.621	12.9513	0.102135	0.515	0.684701	0.0449	0.0307431			C20:5n3	2.76		2.72
C22:6N3	8.32	0.28	102.135	342.515	8.86054	0.102135	0.515	0.665078	0.0449	0.029862			C22:6n3	2.99		nd
C24:1	12.21	0.28	102.135	380.675	11.6998	0.102135	0.515	0.739175	0.0449	0.0331889			Total PUFA	16.08	1.02959	12.88	1.26262
	100									0.335348
Co-culture TW Rep-1
Fatty acids	AS	AIS	WIS (g/mol)	WS (g/mol)	R	IS (mg)	Biomass (g)	FA (mg/g)	Lipid (%)	FA (%)
C4:0	2.78	0.28	102.135	102.135	9.92857	0.102135	0.6967	0.146598	0.0598	0.00876658
C8:0	1.21	0.28	102.135	158.243	2.78919	0.102135	0.6967	0.227132	0.0598	0.0135825
C12:0	ND	0.28	102.135	214.351	#VALUE!	0.102135	0.6967	#VALUE!	0.0598
C14:0	0.15	0.28	102.135	270.459	0.202305	0.102135	0.6967	0.3882	0.0598	0.0232144
C14:1	2.51	0.28	102.135	240.405	3.80844	0.102135	0.6967	0.345062	0.0598	0.0206347
C15:0	ND	0.28	102.135	256.432	#VALUE!	0.102135	0.6967	#VALUE!	0.0598
C15.1	26.3	0.28	102.135	346.5	27.6866	0.102135	0.6967	0.497345	0.0598	0.0297412
C16:0	4.42	0.28	102.135	270.459	5.96125	0.102135	0.6967	0.3882	0.0598	0.0232144
C16:1	0.83	0.28	102.135	268.459	1.12776	0.102135	0.6967	0.385329	0.0598	0.0230427
C18:0	ND	0.28	102.135	298.513	#VALUE!	0.102135	0.6967	#VALUE!	0.0598
C18:1n9	3.71	0.28	102.135	282.46	4.79108	0.102135	0.6967	0.405426	0.0598	0.0242444
C18:2n6	3.22	0.28	102.135	294.513	3.98812	0.102135	0.6967	0.422726	0.0598	0.025279
C18:3n6	1.67	0.28	102.135	278.43	2.18785	0.102135	0.6967	0.399641	0.0598	0.0238985
C18:3n3	2.23	0.28	102.135	292.513	2.78084	0.102135	0.6967	0.419855	0.0598	0.0251073
C20:0	5.35	0.28	102.135	326.567	5.97583	0.102135	0.6967	0.468734	0.0598	0.0280303
C20:1	11.71	0.28	102.135	324.567	13.1604	0.102135	0.6967	0.465863	0.0598	0.0278586
C20:3n3	ND	0.28	102.135	320.567	#VALUE!	0.102135	0.6967	#VALUE!	0.0598
C20:4N6	1.99	0.28	102.135	318.567	2.2786	0.102135	0.6967	0.457251	0.0598	0.0273436
C20:5n3	3.36	0.28	102.135	316.567	3.8716	0.102135	0.6967	0.454381	0.0598	0.027172
C22:0	2.38	0.28	102.135	354.621	2.4481	0.102135	0.6967	0.509001	0.0598	0.0304383
C22:1N9	7.03	0.28	102.135	352.621	7.27216	0.102135	0.6967	0.50613	0.0598	0.0302666
C22:6N3	ND	0.28	102.135	342.515	#VALUE!	0.102135	0.6967	#VALUE!	0.0598
C24:1	19.15	0.28	102.135	380.675	18.3498	0.102135	0.6967	0.546397	0.0598	0.0326746
	100									0.44451

## Sheet: Ch
Axenic Chlamydomonas sp-Rep1
Fatty acids	AS	AIS	WIS (g/mol)	WS (g/mol)	R	IS (mg)	Biomass (g)	FA (mg/g)	Lipid (%)	FA (%)
C4:0	2.95	2.95	102.135	102.135	1	0.102135	0.6677	0.152965	0.0574	0.00878021
C8:0	2.55	2.95	102.135	158.243	0.557915	0.102135	0.6677	0.236997	0.0574	0.0136036
C15.1	12.34	2.95	102.135	346.5	1.233	0.102135	0.6677	0.518946	0.0574	0.0297875
C16:0	3.58	2.95	102.135	270.459	0.458283	0.102135	0.6677	0.405061	0.0574	0.0232505
C18:1n9	6.66	2.95	102.135	282.46	0.816338	0.102135	0.6677	0.423034	0.0574	0.0242822
C18:3n6	1.45	2.95	102.135	278.43	0.180304	0.102135	0.6677	0.416999	0.0574	0.0239357
C20:0	0.66	2.95	102.135	326.567	0.069972	0.102135	0.6677	0.489092	0.0574	0.0280739
C20:1	8.7	2.95	102.135	324.567	0.928042	0.102135	0.6677	0.486097	0.0574	0.027902
C20:3n3	1.11	2.95	102.135	320.567	0.119883	0.102135	0.6677	0.480106	0.0574	0.0275581
C20:5n3	0.78	2.95	102.135	316.567	0.0853064	0.102135	0.6677	0.474116	0.0574	0.0272142
C22:0	1.35	2.95	102.135	354.621	0.131802	0.102135	0.6677	0.531108	0.0574	0.0304856
C22:1N9	24.33	2.95	102.135	352.621	2.38884	0.102135	0.6677	0.528113	0.0574	0.0303137
C22:6N3	1.5	2.95	102.135	342.515	0.151623	0.102135	0.6677	0.512977	0.0574	0.0294449
C24:1	32.04	2.95	102.135	380.675	2.91401	0.102135	0.6677	0.570129	0.0574	0.0327254
	100									0.357358
Axenic Chlamydomonas sp-Rep2
Fatty acids	AS	AIS	WIS (g/mol)	WS (g/mol)	R	IS (mg)	Biomass (g)	FA (mg/g)	Lipid (%)	FA (%)
C4:0	2.02	2.02	102.135	102.135	1	0.102135	0.6677	0.152965	0.0574	0.00878021
C8:0	1.42	2.02	102.135	158.243	0.453719	0.102135	0.6677	0.236997	0.0574	0.0136036
C12:0	0.15	2.02	102.135	214.351	0.0353825	0.102135	0.6677	0.321029	0.0574	0.0184271
C14:0	0.85	2.02	102.135	270.459	0.158906	0.102135	0.6677	0.405061	0.0574	0.0232505
C14:1	0.41	2.02	102.135	240.405	0.086231	0.102135	0.6677	0.360049	0.0574	0.0206668
C15:0	0.56	2.02	102.135	256.432	0.110418	0.102135	0.6677	0.384053	0.0574	0.0220446
C15.1	0.79	2.02	102.135	346.5	0.115278	0.102135	0.6677	0.518946	0.0574	0.0297875
C16:0	36.06	2.02	102.135	270.459	6.74136	0.102135	0.6677	0.405061	0.0574	0.0232505
C16:1	0.26	2.02	102.135	268.459	0.0489687	0.102135	0.6677	0.402065	0.0574	0.0230785
C18:0	10.01	2.02	102.135	298.513	1.69549	0.102135	0.6677	0.447077	0.0574	0.0256622
C18:1n9	12.33	2.02	102.135	282.46	2.20714	0.102135	0.6677	0.423034	0.0574	0.0242822
C18:2n6	15.77	2.02	102.135	294.513	2.70739	0.102135	0.6677	0.441086	0.0574	0.0253183
C18:3n6	0.81	2.02	102.135	278.43	0.147093	0.102135	0.6677	0.416999	0.0574	0.0239357
C18:3n3	0.93	2.02	102.135	292.513	0.160754	0.102135	0.6677	0.43809	0.0574	0.0251464		Parameter	Concentration (based on total lipid, %)
C20:0	0.99	2.02	102.135	326.567	0.15328	0.102135	0.6677	0.489092	0.0574	0.0280739		Fatty acids	Axenic		Co-culture
C20:1	0.34	2.02	102.135	324.567	0.0529661	0.102135	0.6677	0.486097	0.0574	0.027902		C4:0	0.88		0.91
C20:3n3	1.17	2.02	102.135	320.567	0.18454	0.102135	0.6677	0.480106	0.0574	0.0275581		C14:0	2.33		nd
C20:4N6	2.16	2.02	102.135	318.567	0.342828	0.102135	0.6677	0.477111	0.0574	0.0273862		C16:0	2.33		2.41
C20:5n3	3.17	2.02	102.135	316.567	0.50631	0.102135	0.6677	0.474116	0.0574	0.0272142		C18:0	2.57		2.66
C22:0	3.35	2.02	102.135	354.621	0.477643	0.102135	0.6677	0.531108	0.0574	0.0304856		C20:0	2.81		2.91
C22:1N9	0.95	2.02	102.135	352.621	0.136219	0.102135	0.6677	0.528113	0.0574	0.0303137		C22:0	3.05		3.15
C22:6N3	2.14	2.02	102.135	342.515	0.315906	0.102135	0.6677	0.512977	0.0574	0.0294449		Total SFA	13.97	0.762743	12.04	1.26033
C24:1	3.36	2.02	102.135	380.675	0.446281	0.102135	0.6677	0.570129	0.0574	0.0327254
	100									0.568338		C14:1	2.07		2.14
Co-cultureChlamydomonas sp. Rep-1												C15:1	2.98		3.08
Fatty acids	AS	AIS	WIS (g/mol)	WS (g/mol)	R	IS (mg)	Biomass (g)	FA (mg/g)	Lipid (%)	FA (%)		C16:1	2.31		2.39
C4:0	3.94	3.94	102.135	102.135	1	0.102135	0.6677	0.152965	0.0594	0.00908614		C18:1n-9	2.43		nd
C8:0	2.34	3.94	102.135	158.243	0.383327	0.102135	0.6677	0.236997	0.0594	0.0140776		C22:1n-9	3.03		3.14
C12:0	ND	3.94	102.135	214.351	#VALUE!	0.102135	0.6677	#VALUE!	0.0594			C24:1	3.27		3.39
C14:0	ND	3.94	102.135	270.459	#VALUE!	0.102135	0.6677	#VALUE!	0.0594			Total MUFA	16.09	0.475833	14.14	1.24952
C14:1	2.94	3.94	102.135	240.405	0.317017	0.102135	0.6677	0.360049	0.0594	0.0213869
C15:0	ND	3.94	102.135	256.432	#VALUE!	0.102135	0.6677	#VALUE!	0.0594			C18:2n6	2.53		nd
C15.1	23.53	3.94	102.135	346.5	1.76034	0.102135	0.6677	0.518946	0.0594	0.0308254		C18:3n6	2.39		nd
C16:0	3.58	3.94	102.135	270.459	0.343131	0.102135	0.6677	0.405061	0.0594	0.0240606		C18:3n3	2.51		nd
C16:1	1.32	3.94	102.135	268.459	0.12746	0.102135	0.6677	0.402065	0.0594	0.0238827		C20:3n3	2.76		2.85
C18:0	2.97	3.94	102.135	298.513	0.257912	0.102135	0.6677	0.447077	0.0594	0.0265563		C20:4N6	2.73		2.83
C18:1n9	ND	3.94	102.135	282.46	#VALUE!	0.102135	0.6677	#VALUE!	0.0594			C20:5n3	2.72		2.82
C18:2n6	ND	3.94	102.135	294.513	#VALUE!	0.102135	0.6677	#VALUE!	0.0594			C22:6n3	2.94		nd
C18:3n6	ND	3.94	102.135	278.43	#VALUE!	0.102135	0.6677	#VALUE!	0.0594			Total PUFA	18.58	0.186624	8.5	1.51451
C18:3n3	ND	3.94	102.135	292.513	#VALUE!	0.102135	0.6677	#VALUE!	0.0594
C20:0	4.72	3.94	102.135	326.567	0.374669	0.102135	0.6677	0.489092	0.0594	0.0290521
C20:1	0.67	3.94	102.135	324.567	0.0535117	0.102135	0.6677	0.486097	0.0594	0.0288742
C20:3n3	1.52	3.94	102.135	320.567	0.122915	0.102135	0.6677	0.480106	0.0594	0.0285183
C20:4N6	11.57	3.94	102.135	318.567	0.94148	0.102135	0.6677	0.477111	0.0594	0.0283404
C20:5n3	0.99	3.94	102.135	316.567	0.0810677	0.102135	0.6677	0.474116	0.0594	0.0281625
C22:0	7.54	3.94	102.135	354.621	0.55117	0.102135	0.6677	0.531108	0.0594	0.0315478
C22:1N9	18.97	3.94	102.135	352.621	1.39456	0.102135	0.6677	0.528113	0.0594	0.0313699
C22:6N3	ND	3.94	102.135	342.515	#VALUE!	0.102135	0.6677	#VALUE!	0.0594
C24:1	13.4	3.94	102.135	380.675	0.912491	0.102135	0.6677	0.570129	0.0594	0.0338657
	100									0.389607

## Sheet: CV
Axenic C.vulgaris Rep-1
Fatty acids	AS	AIS	WIS (g/mol)	WS (g/mol)	R	IS (mg)	Biomass (g)	FA (mg/g)	Lipid (%)	FA (%)
C4:0	2.06	2.06	102.135	102.135	1	0.102135	0.7363	0.138714	0.035	0.00485498
C8:0	3.13	2.06	102.135	158.243	0.98068	0.102135	0.7363	0.214916	0.035	0.00752208
C12:0	ND	2.06	102.135	214.351	#VALUE!	0.102135	0.7363	#VALUE!	0.035
C14:0	ND	2.06	102.135	270.459	#VALUE!	0.102135	0.7363	#VALUE!	0.035
C14:1	7.53	2.06	102.135	240.405	1.55295	0.102135	0.7363	0.326504	0.035	0.0114276
C15:0	ND	2.06	102.135	256.432	#VALUE!	0.102135	0.7363	#VALUE!	0.035
C15.1	2.19	2.06	102.135	346.5	0.313363	0.102135	0.7363	0.470596	0.035	0.0164709
C16:0	ND	2.06	102.135	270.459	#VALUE!	0.102135	0.7363	#VALUE!	0.035
C16:1	4.03	2.06	102.135	268.459	0.744277	0.102135	0.7363	0.364605	0.035	0.0127612
C18:0	ND	2.06	102.135	298.513	#VALUE!	0.102135	0.7363	#VALUE!	0.035
C18:1n9	ND	2.06	102.135	282.46	#VALUE!	0.102135	0.7363	#VALUE!	0.035
C18:2n6	2.05	2.06	102.135	294.513	0.345109	0.102135	0.7363	0.39999	0.035	0.0139997
C18:3n6	3.49	2.06	102.135	278.43	0.621465	0.102135	0.7363	0.378147	0.035	0.0132352
C18:3n3	7.38	2.06	102.135	292.513	1.25089	0.102135	0.7363	0.397274	0.035	0.0139046
C20:0	2.38	2.06	102.135	326.567	0.361337	0.102135	0.7363	0.443524	0.035	0.0155234
C20:1	5.78	2.06	102.135	324.567	0.882939	0.102135	0.7363	0.440808	0.035	0.0154283
C20:3n3	ND	2.06	102.135	320.567	#VALUE!	0.102135	0.7363	#VALUE!	0.035
C20:4n6	1.46	2.06	102.135	318.567	0.227227	0.102135	0.7363	0.432659	0.035	0.0151431
C20:5n3	2.26	2.06	102.135	316.567	0.353957	0.102135	0.7363	0.429943	0.035	0.015048
C22:0	2.19	2.06	102.135	354.621	0.306187	0.102135	0.7363	0.481626	0.035	0.0168569
C22:1N9	30.51	2.06	102.135	352.621	4.28984	0.102135	0.7363	0.478909	0.035	0.0167618
C22:6N3	5.26	2.06	102.135	342.515	0.761401	0.102135	0.7363	0.465184	0.035	0.0162814
C24:1	18.3	2.06	102.135	380.675	2.38344	0.102135	0.7363	0.517011	0.035	0.0180954
	100									0.223314
Axenic C.vulgaris Rep-2
Fatty acids	AS	AIS	WIS (g/mol)	WS (g/mol)	R	IS (mg)	Biomass (g)	FA (mg/g)	Lipid (%)	FA (%)
C4:0	2.41	2.41	102.135	102.135	1	0.102135	0.7363	0.138714	0.035	0.00485498
C8:0	2.19	2.41	102.135	158.243	0.586512	0.102135	0.7363	0.214916	0.035	0.00752208
C12:0	1.47	2.41	102.135	214.351	0.290636	0.102135	0.7363	0.291119	0.035	0.0101892
C14:0	2.23	2.41	102.135	270.459	0.349431	0.102135	0.7363	0.367322	0.035	0.0128563
C14:1	1.58	2.41	102.135	240.405	0.278529	0.102135	0.7363	0.326504	0.035	0.0114276
C15:0	ND	2.41	102.135	256.432	#VALUE!	0.102135	0.7363	#VALUE!	0.035
C15.1	10.97	2.41	102.135	346.5	1.34172	0.102135	0.7363	0.470596	0.035	0.0164709
C16:0	1.7	2.41	102.135	270.459	0.266382	0.102135	0.7363	0.367322	0.035	0.0128563
C16:1	1.23	2.41	102.135	268.459	0.194171	0.102135	0.7363	0.364605	0.035	0.0127612
C18:0	1.35	2.41	102.135	298.513	0.191658	0.102135	0.7363	0.405423	0.035	0.0141898
C18:1n9	0.66	2.41	102.135	282.46	0.0990249	0.102135	0.7363	0.383621	0.035	0.0134267
C18:2n6	0.99	2.41	102.135	294.513	0.142458	0.102135	0.7363	0.39999	0.035	0.0139997
C18:3n6	2.26	2.41	102.135	278.43	0.343993	0.102135	0.7363	0.378147	0.035	0.0132352
C18:3n3	ND	2.41	102.135	292.513	#VALUE!	0.102135	0.7363	#VALUE!	0.035
C20:0	1.99	2.41	102.135	326.567	0.258249	0.102135	0.7363	0.443524	0.035	0.0155234
C20:1	1.14	2.41	102.135	324.567	0.148853	0.102135	0.7363	0.440808	0.035	0.0154283
C20:3n3	ND	2.41	102.135	320.567	#VALUE!	0.102135	0.7363	#VALUE!	0.035
C20:3n6	0.94	2.41	102.135	320.567	0.12427	0.102135	0.7363	0.435376	0.035	0.0152381
C20:4n6	3.92	2.41	102.135	318.567	0.521486	0.102135	0.7363	0.432659	0.035	0.0151431
C20:5n3	ND	2.41	102.135	316.567	#VALUE!	0.102135	0.7363	#VALUE!	0.035
C22:0	2.26	2.41	102.135	354.621	0.270086	0.102135	0.7363	0.481626	0.035	0.0168569
C22:1N9	38.82	2.41	102.135	352.621	4.66557	0.102135	0.7363	0.478909	0.035	0.0167618
C22:6N3	3.39	2.41	102.135	342.515	0.419448	0.102135	0.7363	0.465184	0.035	0.0162814		Parameter	Concentration (based on total lipid, %)
C24:1	18.5	2.41	102.135	380.675	2.05956	0.102135	0.7363	0.517011	0.035	0.0180954		Fatty acids	Axenic		Co-culture
	100									0.273118		C4:0	0.49		0.92
Co-culture C. vulgaris Rep-1												C14:0	1.29		nd
Fatty acids	AS	AIS	WIS (g/mol)	WS (g/mol)	R	IS (mg)	Biomass (g)	FA (mg/g)	Lipid (%)	FA (%)		C16:0	1.29		nd
C4:0	1.72	1.72	102.135	102.135	1	0.102135	0.515	0.19832	0.0466	0.00924173		C18:0	1.42		nd
C8:0	ND	1.72	102.135	158.243	#VALUE!	0.102135	0.515	#VALUE!	0.0466			C20:0	1.55		nd
C12:0	ND	1.72	102.135	214.351	#VALUE!	0.102135	0.515	#VALUE!	0.0466			C22:0	1.69		3.21
C14:0	ND	1.72	102.135	270.459	#VALUE!	0.102135	0.515	#VALUE!	0.0466			Total SFA	7.73	0.420591	4.13	1.28901
C14:1	3.39	1.72	102.135	240.405	0.837341	0.102135	0.515	0.466806	0.0466	0.0217532
C15:0	ND	1.72	102.135	256.432	#VALUE!	0.102135	0.515	#VALUE!	0.0466			C14:1	1.14		2.18
C15.1	36.42	1.72	102.135	346.5	6.24141	0.102135	0.515	0.672816	0.0466	0.0313532		C15:1	1.65		3.14
C16:0	ND	1.72	102.135	270.459	#VALUE!	0.102135	0.515	#VALUE!	0.0466			C16:1	1.28		nd
C16:1	ND	1.72	102.135	268.459	#VALUE!	0.102135	0.515	#VALUE!	0.0466			C18:1n-9	1.34		nd
C18:0	ND	1.72	102.135	298.513	#VALUE!	0.102135	0.515	#VALUE!	0.0466			C22:1n-9	1.68		3.19
C18:1n9	ND	1.72	102.135	282.46	#VALUE!	0.102135	0.515	#VALUE!	0.0466			C24:1	1.81		3.44
C18:2n6	ND	1.72	102.135	294.513	#VALUE!	0.102135	0.515	#VALUE!	0.0466			Total MUFA	8.9	0.265682	11.95	1.60133
C18:3n6	ND	1.72	102.135	278.43	#VALUE!	0.102135	0.515	#VALUE!	0.0466
C18:3n3	ND	1.72	102.135	292.513	#VALUE!	0.102135	0.515	#VALUE!	0.0466			C18:2n6	1.4		nd
C20:0	ND	1.72	102.135	326.567	#VALUE!	0.102135	0.515	#VALUE!	0.0466			C18:3n6	1.32		nd
C20:1	1.08	1.72	102.135	324.567	0.19759	0.102135	0.515	0.630227	0.0466	0.0293686		C18:3n3	1.39		nd
C20:3n3	ND	1.72	102.135	320.567	#VALUE!	0.102135	0.515	#VALUE!	0.0466			C20:3n3	nd		nd
C20:4N6	9.93	1.72	102.135	318.567	1.85095	0.102135	0.515	0.618577	0.0466	0.0288257		C20:4N6	1.51		2.88
C20:5n3	13.33	1.72	102.135	316.567	2.50041	0.102135	0.515	0.614693	0.0466	0.0286447		C20:5n3	1.5		2.86
C22:0	7.2	1.72	102.135	354.621	1.20563	0.102135	0.515	0.688584	0.0466	0.032088		C22:6n3	1.63		3.1
C22:1N9	9.49	1.72	102.135	352.621	1.5981	0.102135	0.515	0.684701	0.0466	0.0319071		Total PUFA	8.75	0.560357	8.84	1.57693
C22:6N3	6.23	1.72	102.135	342.515	1.08008	0.102135	0.515	0.665078	0.0466	0.0309926
C24:1	11.21	1.72	102.135	380.675	1.74863	0.102135	0.515	0.739175	0.0466	0.0344455
	100									0.27862
