# Supplementary material for: Marine microalgae co-cultured with floc-forming bacterium: Insight into growth and lipid productivity
Source: PeerJ. 2021 Apr 23;9:e11217. doi: 10.7717/peerj.11217 (PMC8074844; doi:10.7717/peerj.11217)
Supplement: Supplemental Information 4 [file peerj-09-11217-s004.xlsx]

## Sheet: Pure culture
Sample(pure culture)-day4	before (mg)	After (mg)	DW mg/L	Lipid content	Average	STD	P (mg/L.day)	std		Sample(pure culture)-day 5	before (mg)	After	dried weight (50mL)	Lipid content (mg/mL)	Lipid content (%)	P (mg/L.day)
T.weissflogii	2321.3	2338.6	418	0.0413876			1.03469			T.weissflogii1.1	2255.3	2270.2	442	0.0337104		0.674208
	2214.3	2229.6	602	0.0366029			0.915072			T.weissflogii1.2	2264.6	2306.3	548			0
	2347.6	2377.9	598	0.0506689			1.26672			T.weissflogii1.3	2270.2	2292.3	555	0.0398198		0.796396
	2272.5	2302.9	599	0.0507513			1.26878			T.weissflogii1.4	2240.8	2259.6	515	0.0365049		0.730097
					0.0448526	0.00704007	1.12132	0.152422		T.weissflogii1.5	2278.9	2296.5	527	0.0333966		0.667932
Chlamydomonas sp.	6174.7	6201.4	490	0.0544898			1.36224						AVERAGE	0.0358579	0.0358579	0.573727
	6143.2	6170.2	548	0.0492701			1.23175						STD	0.00298804		0.290574
	6174.7	6209.9	589	0.0597623			1.49406
	6139.2	6175.1	542.333	0.0661955			1.65489			Chlamy.1	2261	2295.2	730	0.0468493		0.936986
					0.0574294	0.00724573	1.43574	0.156875		Chlamy.2	2261	2289.5	712	0.0400281		0.800562
Chlorella sp.	6206.4	6238.8	494	0.065587			1.63968			Chlamy.3	2261	2281.6	561	0.0367201		0.734403
	6248.1	6282.4	594	0.0577441			1.4436			Chlamy.4	2265.2	2294.9	667.667	0.0444833		0.889666
	6206.5	6216.9	544	0.0191176			0.477941			Chlamy.5	2263.4	2268.9	684			0
	6247.7	6278.9	544	0.0573529	0.0499504	0.0209022	1.43382						AVERAGE	0.0420202	0.0420202	0.672323
							1.24876	0.452545					STD	0.00452571		0.43
										Chlorella.1	2267.9	2298.3	780	0.0389744		0.779487
										Chlorella.2	2278.7	2281.8	666			0
										Chlorella.3	2257.5	2292.9	763	0.0463958		0.927916
										Chlorella.4	2293.4	2312.7	736.333	0.026211		0.524219
										Chlorella.5	2275.9	2296.5	721.6	0.0285477		0.570953
													AVERAGE	0.0350322	0.0350322	0.560515
													STD	0.00939034		0.39
										Sample-Diatom	DF	F	P
										Factor	1	2.27	0.183
										Error	6
										Total	7
										Sample-Cir 1	DF	F	P
										Factor	1	4.31	0.083
										Error	6
										Total	7
										Sample-Cir 2	DF	F	P
										Factor	1	3.38	0.116
										Error	6
										Total	7

## Sheet: Co-culture
Sample(co-culture)-day 4	Empty vial	After	dried weight (mg/L)	Lipid content (mg)	Lipid content (%)	P (mg/L.day)			Sample (co-culture)-day5	Empty vial (mg)	After (mg)	DW mg/L	Lipid content(%)	Average	STD	P (mg/L.day)
T.weissflogii1.1	2256.1	2281.4	642	0.0394081		0.985202			T.weissflogii	6104	6141.6	688	0.0546512			1.09302
T.weissflogii1.2	2263	2287.8	698	0.0355301		0.888252				6242.5	6283.5	700	0.0585714			1.17143
T.weissflogii1.3	2263.2	2298.1	700	0.0498571		1.24643				6140	6188.3	702	0.0688034			1.37607
T.weissflogii1.4	2248.9	2254	680			0				6235.5	6275.2	696.667	0.0569856	0.0597529	0.00624482	1.13971
T.weissflogii1.5	2274.7	2302.6	703	0.0396871		0.992176										1.19506	0.108163
			AVERAGE	0.0411206	0.0411206	0.822412			Chlamydomonas sp.	6196.8	6244.4	688	0.069186			1.38372
			STD	0.00612559		0.478489				6223.9	6267.4	690	0.0630435			1.26087
										6284.2	6309.6	704	0.0360795			0.721591
Chlamy.1	2272.9	2284.2	546	0.020696		0.517399				6166.9	6215.1	694	0.0694524	0.0594404	0.0158528	1.38905
Chlamy.2	2252.8	2293.1	558			0										1.18881	0.274578
Chlamy.3	2235.7	2253.1	562	0.0309609		0.774021			Chlorella sp.	6272.4	6301.1	836	0.0343301			0.686603
Chlamy.4	2251.1	2269.5	565.333	0.0325472		0.813679				6254.6	6287.4	848	0.0386792			0.773585
Chlamy.5	2277	2300.6	556.6	0.0424003		1.06001				6215.3	6247.1	916	0.0347162			0.694323
			AVERAGE	0.0316511	0.0316511	0.633021				6261	6294.7	866.667	0.0388846	0.0366525	0.00246528	0.777692
			STD	0.00888518		0.402778										0.733051	0.0426999
									lipid content(based on dried weight)
Chlorella.1	2265	2291.9	728	0.0369505		1.14294
Chlorella.2	2245.3	2255.2	852			1.43924
Chlorella.3	2253.5	2293	864	0.0457176		1.15658
Chlorella.4	2247.2	2294.1	814.667	0.0575696		1.16563
Chlorella.5	2277.2	2316.2	843	0.0462633		0.211312
			AVERAGE	0.0466253	0.0466253	1.02314
			STD	0.00845247		0.470284

## Sheet: Figure
Axenic(Pure) culture microalgae
Sample	day 4		day 5
	Lipid%	STD	Lipid%	STD
T.weissflogii	4.49	0.01	3.59	0.003
Chlamydomonas sp.	5.74	0.01	4.2	0.00452571
Chlorella sp.	5	0.02	3.5	0.00939034
Co-culture with B.infantis
Sample	day 4		day 5
	Lipid%	STD	Lipid%	STD
T.weissflogii	4.11	0.0061	5.98	0.01
Chlamydomonas sp.	3.17	0.00888518	5.94	0.02
Chlorella sp.	4.66	0.00845247	3.67	0.02
Lipid productivity-Axenic microalgae
Sample	day 4		day 5
	mg/L.day	STD	mg/L.day	STD
T.weissflogii	1.69	0.316854	0.7172	0.0597608
Chlamydomonas sp.	1.36268	0.107086	0.840404	0.0905142
C.vulgaris.	1.5057	0.094819	0.700644	0.187807
Lipid productivity-B.infantis co-cultured
Sample	day 4		day 5
	mg/L.day	STD	mg/L.day	STD
T.weissflogii	0.996055	0.0944617	1.13472	0.0322028
Chlamydomonas sp.	0.791277	0.222129	1.34455	0.0592085
C.vulgaris	1.16563	0.211312	0.561811	0.0770402
