# Supplementary material for: Marine microalgae co-cultured with floc-forming bacterium: Insight into growth and lipid productivity
Source: PeerJ. 2021 Apr 23;9:e11217. doi: 10.7717/peerj.11217 (PMC8074844; doi:10.7717/peerj.11217)
Supplement: Supplemental Information 5 [file peerj-09-11217-s005.xlsx]

## Sheet: Sheet1
Dilution factor (10^2)-day 0 to 3
Dilution factor (10^3) day 4 and onward
Sample	Day												Sample	Cell density (Day)
	0	1	2	3	4	5	6							0	1	2	3	4	5
Tetraselmis	49	55	72	1.2	0.92	0.92	0.66						Tetraselmis sp.	24500	27500	36000	600	460	460
	46	63	75	3	3.5	0.55	0.64							23000	31500	37500	1500	1750	275
			69	6.6	1.3	0.98	0.56									34500	3300	650	490
	47.5	59	72	3.6	1.90667	0.816667	0.62							23750	29500	36750	1800	953.333	408.333
Nitzschia	42	64	42	12.8	6.6	0.97	0.11						Nitzschia sp.	21000	32000	21000	6400	3300	485
	50	64	47	2.4	1.3	0.85	0.7							25000	32000	23500	1200	650	425
			45	2.4	4.9	0.11	0.14									22500	1200	2450	55
	46	64	44.6667	5.86667	4.26667	0.643333	0.316667							23000	32000	22250	2933.33	2133.33	321.667
Oscillatoria sp.	29	4.6	0.248	0.52	0.16	0.27	0.17						Oscillatoria sp.	14500	2300	124	260	80	135
	23	4.9	0.26	0.28	0.25	0.76	0.14							11500	2450	130	140	125	380
			0.164	0.18	0.51	0.78	0.17									82	90	255	390
	26	4.75	0.224	0.326667	0.306667	0.603333	0.16							13000	2375	127	163.333	153.333	301.667
T.weissflogii	23	30	44	99	149	167	157						T. weissflogii	11500	15000	22000	49500	74500	83500
	24	26	49	47	131	168	165							12000	13000	24500	23500	65500	84000
				97	125	151	160							0	0	0	48500	62500	75500
	23.5	28	46.5	81	135	162	160.667							11750	14000	23250	40500	67500	81000
	0.707107	2.82843	3.53553	29.4618	12.49	9.53939	4.04145
Chlamydomonas	42	53	70	59	118	104	186						Chlamydomonas sp.	21000	26500	35000	29500	59000	52000
	38	81	78	138	139	174	183							19000	40500	39000	69000	69500	87000
				65	136	189	160										32500	68000	94500
	40	67	74	87.3333	131	155.667	176.333							20000	33500	37000	43666.7	65500	77833.3
C.vulgaris	30	63	33	57	150	142	171						C. vulgaris	15000	31500	16500	28500	75000	71000
	41	79	83	67	181	133	195							20500	39500	41500	33500	90500	66500
				118	163	137	123										59000	81500	68500
	35.5	71	58	80.6667	164.667	137.333	163							17750	35500	29000	40333.3	82333.3	68666.7
