# Supplementary material for: Marine microalgae co-cultured with floc-forming bacterium: Insight into growth and lipid productivity
Source: PeerJ. 2021 Apr 23;9:e11217. doi: 10.7717/peerj.11217 (PMC8074844; doi:10.7717/peerj.11217)
Supplement: Supplemental Information 6 [file peerj-09-11217-s006.xlsx]

## Sheet: OD 600
Day	600 nm		Average	STD
0	0.003	0.009	0.006	0.00424264
1	0.007	0.013	0.01	0.00424264
2	0.022	0.024	0.023	0.00141421
3	0.045	0.039	0.042	0.00424264
4	0.09	0.121	0.1055	0.0219203
5	0.162	0.165	0.1635	0.00212132
6	0.109	0.102	0.1055	0.00494975
7	0.045	0.101	0.073	0.039598
8	0.11	0.12	0.115	0.00707107
Day	600 nm		Average	STD
0	0.004	0.009	0.0065	0.00353553
1	0.012	0.028	0.02	0.0113137
2	0.041	0.037	0.039	0.00282843
3	0.086	0.08	0.083	0.00424264
4	0.133	0.137	0.135	0.00282843
5	0.14	0.138	0.139	0.00141421
6	0.105	0.106	0.1055	0.000707107
7	0.102	0.096	0.099	0.00424264
8	0.16	0.15	0.155	0.00707107
Day	600nm		Average	STD
0	0.006	0.002	0.004	0.00282843
1	0.006	0.006	0.006	0
2	0.009	0.013	0.011	0.00282843
3	0.066	0.058	0.062	0.00565685
4	0.139	0.108	0.1235	0.0219203
5	0.183	0.153	0.168	0.0212132
6	0.135	0.3	0.2175	0.116673
7	0.121	0.31	0.2155	0.133643
8	0.193	0.183	0.188	0.00707107
	Diatom
Day	CFU	OD 600
0	310000	0.006
1	416667	0.01
2	450000	0.023
3	423333	0.042
4	693333	0.1055
5	1.16667e+06	0.1635
6	1.44333e+06	0.1055
7	1180000	0.073
Day	Cir 1	OD 600
0	316667	0.0065
1	590000	0.02
2	1.10333e+06	0.039
3	1.22333e+06	0.083
4	1070000	0.135
5	980000	0.139
6	690000	0.1055
7	810000	0.099
8	640000	0.155
Day	Chlorella sp.	OD 600
0	390000	0.004
1	746667	0.006
2	1130000	0.011
3	1300000	0.062
4	1240000	0.1235
5	1.28667e+06	0.168
6	530000	0.2175
7	650000	0.2155
8	440000	0.188

## Sheet: CFU
	Cell number (×10^5)
Day	0	1	2	3	4	5	6	7	8
T. weissflogii	3.3	5.5	4.7	5.6	7.3	12.2	15.5	11.2	11.4
	2.75	6.5	4.6	4.9	6.3	12.4	16.3	10.6	15.2
	2.75	5.6	5.2	6.2	7.2	13.4	16.5	13.6	9.2
Average	2.93333	5.86667	4.83333	5.56667	6.93333	13.6667	16.1	11.8	11.9333
STD	0.317543	0.550757	0.321455	0.650641	0.550757	0.64291	0.52915	1.58745	3.03535
Chlamydomonas sp.	3.4	5.1	15.6	15.95	10.2	11.8	13.3	13.7	5.2
	3	6.4	15.5	17.6	11.6	9.4	10.1	14.3	4.1
	2.9	6.3	15	16.4	10.4	10.2	12.2	13.3	6.9
Average	3.1	5.93333	15.3667	16.65	10.7333	9.8	11.8667	13.7667	5.4
STD	0.264575	0.723418	0.321455	0.852936	0.757188	1.22202	1.62583	0.503322	1.41067
Chlorella sp.	2.7	9.1	12.3	14.7	12.2	7.5	7.6	4.6	5.3
	2.8	10.5	12.8	15.6	11.6	10.2	6.4	3.3	3.6
	3.2	9.8	13.8	14.7	11.4	10.9	6.9	3.95	4.9
Average	2.9	9.8	12.9667	15	11.7333	9.53333	6.96667	3.95	4.6
STD	0.264575	0.7	0.763763	0.519615	0.416333	1.79536	0.602771	0.65	0.888819
	cell number
Day	T. weissflogii	Chlamydomonas sp.	C. vulgaris
0	2.93	3.1	2.9
1	5.86667	5.93333	9.8
2	4.83333	15.3667	12.9667
3	5.56667	16.65	15
4	6.93333	10.7333	11.7333
5	13.6667	9.8	9.53333
6	16.1	11.8667	6.96667
7	11.8	13.7667	3.95
8	11.9333	5.4	4.6
One-way ANOVA: Pure T. weissflogii Chlamydomonas sp., Chlorella sp.
Source	DF	SS	MS	F	P
Factor	2	0.5	0.3	0.02	0.981
Error	24	331.5	13.8
Total	26	331.5
