# Supplementary material for: Marine microalgae co-cultured with floc-forming bacterium: Insight into growth and lipid productivity
Source: PeerJ. 2021 Apr 23;9:e11217. doi: 10.7717/peerj.11217 (PMC8074844; doi:10.7717/peerj.11217)
Supplement: Supplemental Information 7 [file peerj-09-11217-s007.xlsx]

## Sheet: Inoculum
Day0	665nm	645nm	630nm	Chl a	STD		Day1	665nm	645nm	630nm	Chl a	STD		Day2	665nm	645nm	630nm	Chl a	STD
Tetraselmis sp.	0.005	0.004	0.005	0.05206			Tetraselmis sp.	0.038	0.029	0.025	0.39931			Tetraselmis sp.	0.019	0.011	0.011	0.20445
	0.006	0.005	0.005	0.06235				0.016	0.022	0.021	0.15384				0.022	0.01	0.009	0.24084
	0.007	0.006	0.007	0.07236				0.03	0.01	0.013	0.33308				0.01	0.006	0.004	0.10758
	0.011	0.01	0.011	0.11296				0.009	0.006	0.005	0.09584				0.006	0.002	0.002	0.0667
	0.025	0.01	0.014	0.27494				0.024	0.014	0.013	0.25824				0.004	0	0.001	0.04626
				0.101982	0.0505977						0.248062	0.124757						0.133166	0.0855864
Nitzschia sp.	0.042	0.007	0.013	0.47621			Nitzschia sp.	0.007	0.004	0.004	0.0754			Nitzschia sp.	0.032	0.021	0.023	0.34047
	0.072	0.063	0.055	0.74497				0.01	0.005	0.005	0.10875				0.005	0	0	0.058
	0.04	0.022	0.019	0.43252				0.052	0.031	0.029	0.55853				0.031	0.014	0.013	0.33944
	0.069	0.051	0.05	0.72659				0.038	0.021	0.019	0.41063				0.011	0.003	0.005	0.12297
	0.023	0.012	0.012	0.2494				0.035	0.018	0.017	0.38004				0.018	0.009	0.007	0.19603
				0.078007	0.044699						0.30667	0.207535						0.211382	0.127123
Oscillatoria sp.	0.002	0	0.001	0.02306			Oscillatoria sp.	0.02	0.018	0.012	0.20674			Oscillatoria sp.	0.017	0.008	0.009	0.18546
	0.005	0.002	0.005	0.05468				0.021	0.01	0.007	0.22952				0.023	0.002	0.002	0.2639
	0.004	0.003	0.001	0.04233				0.009	0.002	0.003	0.10136				0.015	0.009	0.007	0.16123
	0.002	0.002	0	0.02058				0.009	0.006	0.009	0.09528				0.022	0.019	0.022	0.22723
				0.0477735	0.0315126			0.021	0.007	0.006	0.23359				0.014	0.001	0.006	0.16025
											0.173298	0.0692392						0.199614	0.0450514
T. weissflogii	0.005	0.005	0.004	0.05089			T. weissflogii	0.018	0.009	0.005	0.19631			T. weissflogii	0.027	0.016	0.016	0.29
	0.005	0.006	0.004	0.04958				0.016	0.022	0.021	0.15384				0.029	0.016	0.016	0.3132
	0.008	0.004	0.003	0.08714				0.03	0.008	0.008	0.3364				0.022	0.011	0.012	0.23911
	0.007	0.003	0.003	0.07685				0.009	0.006	0.006	0.0957				0.006	0.004	0.003	0.06394
	0.006	0.002	0.003	0.06656				0.01	0.006	0.006	0.1073				0.018	0.007	0.009	0.19837
				0.066204	0.0162992						0.17791	0.097187						0.220924	0.0984502
Chlamydomonas sp.	0	-0.098	-0.067	0.13776			Chlamydomonas sp.	0.003	-0.076	-0.082	0.14584			Chlamydomonas sp.	0.017	0.013	0.014	0.17821
	0.001	0.001	0.001	0.01015				0.007	0.004	0.005	0.07526				0.016	0.012	0.012	0.1682
	0.001	-0.093	-0.067	0.14281				0.01	0.005	0.005	0.10875				0.016	0.007	0.007	0.17545
	0.003	-0.091	-0.096	0.16745				0.022	0.012	0.011	0.23794				0.07	0.063	0.064	0.72051
	0.008	0.002	0.002	0.0899				0.018	0.007	0.005	0.19893				0.013	0.012	0.012	0.1334
				0.109614	0.0622915						0.153344	0.0659102						0.275154	0.249607
C. vulgaris	0.004	0	0	0.0464			C. vulgaris	0.017	0.008	0.006	0.18588			C. vulgaris	0.036	0.017	0.013	0.39351
	0.002	-0.097	0	0.15027				0.002	0.003	0.004	0.01871				0.039	0.015	0.017	0.43037
	0.005	0.001	0.001	0.05655				0.007	0.005	0.005	0.07395				0.03	0.01	0.01	0.3335
	0.002	-0.089	0.001	0.13965				0.025	0.02	0.019	0.26114				0.02	0.008	0.007	0.22054
				0.0982175	0.0543058			0.006	0.004	0.002	0.06408				0.048	0.013	0.012	0.53809
											0.120752	0.099706						0.383202	0.117527
Day3	665nm	645nm	630nm	Chl a	STD		Day4	665nm	645nm	630nm	Chl a	STD		Day5	665nm	645nm	630nm	Chl a	STD
Tetraselmis sp.	0.012	0.004	0.002	0.13368			Tetraselmis sp.	0.004	-0.082	-0.089	0.16628			Tetraselmis sp.
	0.009	0.002	-0.097	0.11536				0.012	0.001	0	0.13789
	0.014	0.005	0.001	0.15571				0.008	-0.097	0	0.21987
	0.013	0.002	-0.089	0.16064				0.002	-0.081	-0.091	0.14205
	0.01	0.005	0.002	0.10917				0.005	-0.082	-0.089	0.17788
				0.134912	0.0231351						0.168794	0.0330452
Nitzschia sp.	0.004	-0.091	-0.096	0.17905			Nitzschia sp.	0.017	0.009	0.005	0.18471			Nitzschia sp.
	0.012	0.002	-0.089	0.14904				0.002	-0.082	-0.089	0.14308
	0.005	-0.094	-0.096	0.19458				0.012	0.004	0.006	0.13312
	0.007	-0.084	-0.091	0.20398				0.008	0.006	0.006	0.0841
	0.011	0.004	0.001	0.12222				0.005	-0.082	-0.089	0.17788
				0.169774	0.0337739						0.144578	0.0403445
Oscillatoria sp.	0.009	0.009	0.009	0.09135			Oscillatoria sp.	0.006	-0.073	-0.084	0.17699			Oscillatoria sp.
	0.011	0.032	0.033	0.08106				0.004	-0.068	-0.099	0.14934
	0.013	0.023	0.014	0.11871				0.017	0.009	0.008	0.18429
	0.014	0.014	0.005	0.14336				0.012	0.014	0.012	0.11918
	0.001	-0.099	-0.102	0.15557				0.009	0.001	0.001	0.10295
				0.11801	0.0321322						0.15745	0.029623
T. weissflogii	0.081	0.02	0.026	0.90976			T. weissflogii	0.095	0.052	0.055	1.02618			T. weissflogii	0.107	0.059	0.061	1.15537
	0.075	0.0639	0.035	0.781391				0.034	0.021	0.023	0.36367				0.089	0.04	0.042	0.97412
	0.066	0.032	0.032	0.7192				0.098	0.053	0.05	1.06037				0.084	0.042	0.043	0.91336
	0.079	0.034	0.036	0.86682				0.1	0.054	0.05	1.08226				0.108	0.062	0.065	1.16248
	0.071	0.039	0.031	0.76817				0.094	0.046	0.044	1.02398				0.136	0.075	0.075	1.46885
				0.809068	0.0774421						0.911292	0.3071						1.13484	0.216583
Chlamydomonas sp.	0.048	0.013	0.002	0.53949			Chlamydomonas sp.	0.066	0.019	0.005	0.74001			Chlamydomonas sp.	0.084	0.032	0.029	0.92842
	0.071	0.033	0.019	0.77771				0.086	0.038	0.036	0.94278				0.095	0.042	0.037	1.0418
	0.046	0.021	0.071	0.49615				0.058	0.035	0.037	0.62177				0.096	0.049	0.047	1.04283
	0.041	0.026	0.024	0.43818				0.056	0.023	0.039	0.61401				0.084	0.026	0.024	0.93698
	0.046	0.024	0.027	0.49838				0.053	0.021	0.021	0.58435				0.109	0.087	0.077	1.13965
				0.549982	0.132316						0.700584	0.147843						1.01794	0.0874221
C. vulgaris	0.098	0.059	0.052	1.05223			C. vulgaris	0.11	0.043	0.041	1.21393			C. vulgaris	0.206	0.104	0.076	2.24272
	0.1	0.067	0.068	1.06271				0.113	0.068	0.066	1.21248				0.208	0.103	0.074	2.26751
	0.105	0.077	0.073	1.10691				0.114	0.055	0.051	1.24321				0.206	0.106	0.08	2.23954
	0.095	0.07	0.072	1.00022				0.114	0.052	0.051	1.24714				0.204	0.106	0.08	2.21634
	0.098	0.041	0.047	1.07651				0.115	0.076	0.054	1.22688				0.201	0.107	0.0775	2.18058
				1.05972	0.0390963						1.22873	0.0160867						2.22934	0.0327359
	Day producing inoculum( Chl a)						SD
Sample	0	1	2	3	4	5	0	1	2	3	4	5
Tetraselmis sp.	0.101982	0.248062	0.133166	0.134912	0.168794		0.0505977	0.124757	0.0855864	0.0231351	0.0330452
Nitzschia sp.	0.078007	0.30667	0.211382	0.169774	0.144578		0.044699	0.207535	0.127123	0.0337739	0.0403445
Oscillatoria sp.	0.0477735	0.173298	0.199614	0.11801	0.15745		0.0315126	0.0692392	0.0450514	0.0321322	0.029623
T. weissflogii	0.066204	0.17791	0.220924	0.809068	0.911292	1.13484	0.0162992	0.097187	0.0984502	0.0774421	0.3071	0.216583
Chlamydomonas sp.	0.109614	0.153344	0.275154	0.549982	0.700584	1.01794	0.0622915	0.0659102	0.249607	0.132316	0.147843	0.0874221
C. vulgaris	0.0982175	0.120752	0.383202	1.05972	1.22873	2.22934	0.0543058	0.099706	0.117527	0.0390963	0.0160867	0.0327359

## Sheet: Raw abs
Day0	665nm	645nm	630nm	452nm	chl a		carotenoid		biomass			Day1	665nm	645nm	630nm	452nm	chl a		carotenoid		biomass				Day2	665nm	645nm	630nm	452nm	chl a		carotenoid		biomass				Day3	665nm	645nm	630nm	452nm	chl a		carotenoid		biomass
diatom	0.013	0.005	0.004	0.018	0.14369		0.06948		9.62723			diatom	0.028	0.019	0.025	0.018	0.29641		0.06948		19.8595		0.724085		diatom	0.015	0.002	0.004	0.026	0.17082		0.10036		11.4449				diatom	0.027	0.016	0.016	0.022	0.29		0.08492		19.43
	0.015	0.006	0.004	0.029	0.16558		0.11194		11.0939				0.016	0.022	0.021	0.019	0.15384		0.07334		10.3073		-0.0735414			0.02	0.003	0.004	0.021	0.22751		0.08106		15.2432					0.029	0.016	0.016	0.021	0.3132		0.08106		20.9844
	0.018	0.004	0.003	0.013	0.20314		0.05018		13.6104				0.03	0.008	0.008	0.038	0.3364		0.14668		22.5388		0.504406			0.029	0.024	0.021	0.046	0.30202		0.17756		20.2353					0.022	0.011	0.012	0.018	0.23911		0.06948		16.0204
	0.017	0.003	0.003	0.014	0.19285		0.05404		12.9209				0.019	0.016	0.016	0.022	0.1972		0.08492		13.2124		0.0223058			0.028	0.023	0.021	0.033	0.29173		0.12738		19.5459					0.026	0.014	0.013	0.014	0.28144		0.05404		18.8565
	0.016	0.004	0.003	0.012	0.17994		0.04632		12.056				0.023	0.015	0.013	0.018	0.24533		0.06948		16.4371		0.309981			0.038	0.021	0.014	0.038	0.41133		0.14668		27.5591					0.031	0.016	0.017	0.021	0.33626		0.08106		22.5294
					0.17704	0.023362	0.066392	0.0269372	11.8617	1.56525							0.245836	0.0734652	0.08878	0.0329799	16.471	4.92217								0.280682	0.0901987	0.126608	0.0379578	18.8057	6.04331								0.292002	0.0364735	0.074112	0.0126264	19.5641	2.44372
Cir1	0.016	0.007	0.003	0.019	0.17601		0.07334		11.7927			Cir 1	0.037	0.034	0.035	0.058	0.37976		0.22388		25.4439		0.768999		Cir 1	0.048	0.023	0.023	0.035	0.52345		0.1351		35.0711				Cir 1	0.037	0.033	0.024	0.043	0.38261		0.16598		25.6349
	0.014	0.006	0.002	0.015	0.15426		0.0579		10.3354				0.02	0.015	0.015	0.056	0.21025		0.21616		14.0868		0.309658			0.035	0.023	0.021	0.035	0.37293		0.1351		24.9863					0.056	0.032	0.032	0.042	0.6032		0.16212		40.4144
	0.013	0.01	0.005	0.025	0.137		0.0965		9.179				0.042	0.032	0.031	0.061	0.44094		0.23546		29.543		1.16893			0.068	0.055	0.056	0.032	0.70891		0.12352		47.497					0.064	0.037	0.037	0.051	0.68875		0.19686		46.1462
	0.009	0.011	0.006	0.017	0.08915		0.06562		5.97305				0.038	0.017	0.015	0.089	0.41643		0.34354		27.9008		1.5414			0.049	0.019	0.019	0.04	0.54085		0.1544		36.237					0.057	0.033	0.034	0.046	0.61321		0.17756		41.0851
	0.012	0.008	0.008	0.012	0.1276		0.04632		8.5492				0.037	0.016	0.014	0.087	0.40628		0.33582		27.2208		1.15814			0.049	0.016	0.016	0.039	0.5452		0.15054		36.5284					0.076	0.043	0.039	0.057	0.81981		0.22002		54.9273
					0.136804	0.032394	0.067936	0.0188311	9.16587	2.1704							0.370732	0.0923541	0.270972	0.0631555	24.839	6.18772								0.538268	0.11909	0.139732	0.0126264	36.064	7.97902								0.621516	0.159155	0.184508	0.0240128	41.6416	10.6634
Cir2	0.024	0.024	0.022	0.026	0.24388		0.10036		16.34			Cir 2	0.012	0.003	0.004	0.016	0.13471		0.06176		9.02557		-0.593552		Cir 2	0.038	0.013	0.017	0.039	0.42139		0.15054		28.2331				Cir 2	0.056	0.027	0.013	0.087	0.61241		0.33582		41.0315
	0.032	0.025	0.029	0.026	0.33439		0.10036		22.4041				0.027	0.015	0.005	0.016	0.29285		0.06176		19.621		-0.132647			0.032	0.021	0.016	0.041	0.34145		0.15826		22.8771					0.059	0.02	0.017	0.089	0.65582		0.34354		43.9399
	0.025	0.014	0.009	0.031	0.2704		0.11966		18.1168				0.025	0.014	0.004	0.019	0.2711		0.07334		18.1637		0.00258541			0.028	0.023	0.017	0.041	0.29229		0.15826		19.5834					0.055	0.014	0.014	0.048	0.6177		0.18528		41.3859
	0.022	0.011	0.006	0.031	0.23995		0.11966		16.0766				0.026	0.004	0.002	0.019	0.29608		0.07334		19.8374		0.210199			0.036	0.022	0.019	0.043	0.38612		0.16598		25.87					0.042	0.018	0.017	0.033	0.46124		0.12738		30.9031
	0.021	0.01	0.012	0.023	0.22882		0.08878		15.3309				0.02	0.009	0.006	0.01	0.21937		0.0386		14.6978		-0.0421759			0.035	0.024	0.02	0.039	0.37176		0.15054		24.9079					0.054	0.024	0.025	0.069	0.59146		0.26634		39.6278
					0.263488	0.0424713	0.105764	0.0135375	17.6537	2.84558							0.242822	0.067781	0.06176	0.0141825	16.2691	4.54133								0.362602	0.0486934	0.156716	0.00645902	24.2943	3.26246								0.587726	0.0744264	0.251672	0.0943294	39.3776	4.98657
Day4	665nm	645nm	630nm	452nm	chl a		carotenoid		biomass			Day5	665nm	645nm	630nm	452nm	chl a		carotenoid		biomass				Day6	665nm	645nm	630nm	452nm	chl a		carotenoid		biomass				Day7	665nm	645nm	630nm	452nm	chl a		carotenoid		biomass
diatom	0.072	0.025	0.027	0.081	0.79867		0.31266		53.5109		1.01307	diatom	0.105	0.042	0.035	0.377	1.15808		1.45522		77.5914				diatom	0.207	0.045	0.055	0.539	2.33455		2.08054		156.415				diatom	0.127	0.025	0.029	0.327	1.43639		1.26222		96.2381
	0.071	0.029	0.021	0.075	0.78267		0.2895		52.4389		0.915869		0.094	0.041	0.034	0.38	1.03193		1.4668		69.1393					0.207	0.045	0.055	0.538	2.33455		2.07668		156.415					0.12	0.039	0.034	0.305	1.33615		1.1773		89.522
	0.068	0.018	0.019	0.104	0.76256		0.40144		51.0915				0.098	0.033	0.03	0.32	1.08937		1.2352		72.9878					0.212	0.045	0.046	0.622	2.39381		2.40092		160.385					0.137	0.032	0.039	0.41	1.54182		1.5826		103.302
	0.057	0.019	0.018	0.094	0.63379		0.36284		42.4639		0.811798		0.1	0.034	0.03	0.314	1.11126		1.21204		74.4544					0.202	0.043	0.043	0.623	2.28085		2.40478		152.817					0.123	0.03	0.038	0.384	1.38218		1.48224		92.6061
	0.055	0.019	0.018	0.101	0.61059		0.38986		40.9095				0.103	0.031	0.028	0.314	1.15027		1.21204		77.0681
					0.717656	0.0884634	0.35126	0.0485962	48.083	5.92705	0.913578	0.100654					1.10818	0.0510856	1.31626	0.132539	74.2482	3.42273								2.33594	0.0461436	2.24073	0.187213	156.508	3.09162								1.42413	0.088509	1.37609	0.188324	95.417	5.9301
Cir 1	0.083	0.042	0.042	0.072	0.9019		0.27792		60.4273			Cir 1	0.126	0.057	0.05	0.109	1.37993		0.42074		92.4553		0.425284		Cir 1	0.203	0.129	0.126	0.319	2.16817		1.23134		145.267		0.451851		Cir 1	0.303	0.136	0.121	0.433	3.3197		1.67138		222.42
	0.083	0.049	0.038	0.077	0.89329		0.29722		59.8504				0.126	0.058	0.062	0.107	1.37694		0.41302		92.255		0.432708			0.21	0.129	0.129	0.308	2.24895		1.18888		150.68		0.4906			0.302	0.135	0.132	0.439	3.30787		1.69454		221.627
	0.081	0.041	0.043	0.071	0.87987		0.27406		58.9513				0.118	0.062	0.067	0.108	1.2782		0.41688		85.6394		0.373434			0.218	0.168	0.169	0.308	2.28506		1.18888		153.099		0.580939			0.316	0.141	0.132	0.454	3.46241		1.75244		231.981
	0.086	0.042	0.047	0.088	0.936		0.33968		62.712				0.132	0.062	0.059	0.106	1.44172		0.40916		96.5952		0.431977			0.207	0.148	0.147	0.317	2.18674		1.22362		146.512		0.416575			0.313	0.143	0.136	0.417	3.42443		1.60962		229.437
	0.088	0.046	0.057	0.064	0.95256		0.24704		63.8215				0.124	0.059	0.06	0.108	1.35271		0.41688		90.6316		0.350712
					0.912724	0.0304257	0.287184	0.0343735	61.1525	2.03852							1.3659	0.0590183	0.415336	0.00440108	91.5153	3.95423	0.402823							2.22223	0.0542942	1.20818	0.0225075	148.889	3.63771	0.484991	0.0707498						3.3786	0.0765864	1.682	0.0590782	226.366	5.13129
Cir 2	0.109	0.054	0.059	0.159	1.1854		0.61374		79.4218			Cir 2	0.189	0.133	0.111	0.455	2.00263		1.7563		134.176		0.524381		Cir 2	0.418	0.215	0.215	0.439	4.53705		1.69454		303.982		0.817816		Cir 2	0.535	0.231	0.213	0.983	5.87357		3.79438		393.529
	0.098	0.064	0.057	0.163	1.04498		0.62918		70.0137				0.197	0.132	0.111	0.459	2.09674		1.77174		140.482		0.696386			0.437	0.248	0.244	0.446	4.71016		1.72156		315.581		0.809338			0.549	0.253	0.221	0.985	6.00603		3.8021		402.404
	0.082	0.041	0.047	0.126	0.89091		0.48636		59.691				0.194	0.155	0.145	0.467	2.02705		1.80262		135.812		0.822093			0.434	0.258	0.251	0.466	4.6443		1.79876		311.168		0.829059			0.557	0.289	0.237	0.944	6.04943		3.64384		405.312
	0.098	0.061	0.067	0.142	1.04751		0.54812		70.1832				0.194	0.124	0.121	0.452	2.07102		1.74472		138.758		0.681625			0.421	0.27	0.26	0.44	4.51048		1.6984		302.202		0.778362			0.525	0.267	0.231	0.973	5.70789		3.75578		382.429
	0.105	0.074	0.077	0.153	1.11028		0.59058		74.3888				0.196	0.192	0.194	0.444	1.99492		1.71384		133.66		0.585992
					1.05582	0.108557	0.573596	0.0575516	70.7397	7.27334							2.03847	0.0440636	1.75784	0.0328214	136.578	2.95226	0.662095							4.6005	0.093226	1.72831	0.0484554	308.233	6.24614	0.808644	0.0217436						5.90923	0.153662	3.74902	0.0729921	395.918	10.2953
																									Afilament													Afilament
																									Bfilament													Bfilament
Day8	665nm	645nm	630nm	452nm	chl a		carotenoid		biomass			Day9	665nm	645nm	630nm	452nm	chl a		carotenoid		biomass
diatom	0.063	0.019	0.022	0.188	0.70283		0.72568		47.0896			diatom
	0.065	0.024	0.027	0.193	0.71878		0.74498		48.1583
	0.05	0.014	0.017	0.153	0.55928		0.59058		37.4718
	0.057	0.012	0.015	0.149	0.64338		0.57514		43.1065
					0.656067	0.0722228	0.659095	0.088605	43.9565	4.83893
Cir 1	0.183	0.054	0.059	0.393	2.0438		1.51698		136.935			Cir 1	0.118	0.045	0.038	0.374	1.30453		1.44364		87.4035
	0.194	0.054	0.043	0.394	2.17364		1.52084		145.634				0.101	0.028	0.021	0.3808	1.13198		1.46989		75.8427
	0.176	0.046	0.048	0.397	1.97462		1.53242		132.3				0.078	0.03	0.026	0.389	0.86186		1.50154		57.7446
	0.183	0.045	0.047	0.394	2.05727		1.52084		137.837				0.066	0.016	0.012	0.372	0.74296		1.43592		49.7783
					2.06233	0.082567	1.52277	0.00668572	138.176	5.53199							1.01033	0.254874	1.46275	0.0296685	67.6923	17.0766
Cir 2	0.66	0.309	0.216	1.158	7.22097		4.46988		483.805			Cir 2	0.619	0.319	0.152	1.215	6.74123		4.6899		451.662
	0.659	0.319	0.263	1.146	7.18969		4.42356		481.709				0.603	0.284	0.142	1.209	6.60288		4.66674		442.393
	0.669	0.329	0.266	1.203	7.29217		4.64358		488.575				0.619	0.319	0.154	1.253	6.74095		4.83658		451.644
	0.669	0.336	0.267	1.181	7.28286		4.55866		487.952				0.624	0.334	0.156	1.208	6.77902		4.66288		454.194
					7.24642	0.0492847	4.52392	0.0974984	485.51	3.30207							6.71602	0.0775171	4.71402	0.08257	449.973	5.19365
												Afilament
												Bfilament

## Sheet: Raw abs (Co)
Day0	665nm	645nm	630nm	452nm	Chl a		carotenoid		Biomass				Day1	665nm	645nm	630nm	452nm	Chl a		carotenoid		Biomass				Day2	665nm	645nm	630nm	452nm	Chl a		carotenoid		Biomass				Day3	665nm	645nm	630nm	452nm	Chl a		carotenoid		Biomass
diatom	0.024	0.003	0.004	0.011	0.27391		0.04246		18.352				diatom	0.016	0.005	0.005	0.048	0.17835		0.18528		11.9494				diatom	0.065	0.019	0.02	0.102	0.72631		0.39372		48.6628				diatom	0.097	0.059	0.061	0.182	1.03937		0.70252		69.6378
	0.019	0.013	0.013	0.021	0.20155		0.08106		13.5038					0.022	0.013	0.012	0.042	0.23649		0.16212		15.8448					0.065	0.02	0.02	0.101	0.725		0.38986		48.575					0.089	0.04	0.042	0.198	0.97412		0.76428		65.266
	0.007	0.009	0.008	0.016	0.06829		0.06176		4.57543					0.015	0.006	0.007	0.035	0.16516		0.1351		11.0657					0.058	0.032	0.037	0.109	0.6257		0.42074		41.9219					0.084	0.024	0.027	0.188	0.93918		0.72568		62.9251
	0.012	0.014	0.012	0.015	0.11918		0.0579		7.98506					0.014	0.005	0.006	0.038	0.15501		0.14668		10.3857					0.057	0.039	0.032	0.107	0.60563		0.41302		40.5772					0.08	0.022	0.025	0.196	0.89568		0.75656		60.0106
	0.012	0.013	0.013	0.016	0.12035		0.06176		8.06345					0.02	0.01	0.009	0.039	0.21764		0.15054		14.5819					0.06	0.04	0.043	0.11	0.63758		0.4246		42.7179					0.08	0.021	0.022	0.19	0.89741		0.7334		60.1265
					0.156656	0.0810788	0.060988	0.0137559	10.496	5.43228								0.19053	0.0350033	0.155944	0.0190279	12.7655	2.34522								0.664044	0.0573923	0.408388	0.0157741	44.4909	3.84528								0.949152	0.0599971	0.736488	0.0247763	63.5932	4.01981
Cir1	0.015	0.008	0.008	0.021	0.1624		0.08106		10.8808				Cir1	0.043	0.026	0.025	0.033	0.46124		0.12738		30.9031				Cir1	0.088	0.032	0.039	0.085	0.97342		0.3281		65.2191				Cir1	0.094	0.042	0.049	0.212	1.02852		0.81832		68.9108
	0.01	0.009	0.008	0.015	0.10309		0.0579		6.90703					0.031	0.013	0.012	0.057	0.34089		0.22002		22.8396					0.086	0.034	0.029	0.083	0.949		0.32038		63.583					0.105	0.042	0.037	0.217	1.1578		0.83762		77.5726
	0.011	0.009	0.007	0.009	0.11483		0.03474		7.69361					0.041	0.027	0.025	0.032	0.43673		0.12352		29.2609					0.087	0.031	0.028	0.071	0.96467		0.27406		64.6329					0.096	0.049	0.037	0.215	1.04423		0.8299		69.9634
	0.01	0.008	0.006	0.008	0.10468		0.03088		7.01356					0.041	0.029	0.028	0.025	0.43369		0.0965		29.0572					0.089	0.034	0.029	0.07	0.9838		0.2702		65.9146					0.106	0.046	0.044	0.216	1.16318		0.83376		77.9331
	0.012	0.01	0.009	0.013	0.12484		0.05018		8.36428					0.039	0.026	0.026	0.047	0.4147		0.18142		27.7849					0.073	0.037	0.039	0.084	0.79287		0.32424		53.1223					0.088	0.049	0.043	0.214	0.95059		0.82604		63.6895
					0.121968	0.0242343	0.050952	0.0201313	8.17186	1.6237								0.41745	0.0458858	0.149768	0.0499121	27.9691	3.07435								0.932752	0.0792299	0.303396	0.0287045	62.4944	5.3084								1.06886	0.0908685	0.829128	0.00742486	71.6139	6.08819
Cir2	0.019	0.01	0.008	0.01	0.20618		0.0386		13.8141				Cir2	0.053	0.026	0.013	0.055	0.57892		0.2123		38.7876				Cir2	0.316	0.154	0.0106	0.497	3.46238		1.91842		231.979				Cir2	0.424	0.255	0.229	0.683	4.55229		2.63638		305.003
	0.021	0.011	0.008	0.008	0.22807		0.03088		15.2807					0.054	0.027	0.014	0.054	0.58907		0.20844		39.4677					0.328	0.153	0.104	0.491	3.58981		1.89526		240.517					0.417	0.242	0.219	0.664	4.48952		2.56304		300.798
	0.022	0.008	0.01	0.009	0.24332		0.03474		16.3024					0.097	0.063	0.046	0.056	1.03623		0.21616		69.4274					0.326	0.168	0.108	0.538	3.5464		2.07668		237.609					0.404	0.197	0.196	0.668	4.40089		2.57848		294.86
	0.025	0.01	0.009	0.007	0.27564		0.02702		18.4679					0.083	0.05	0.033	0.07	0.89268		0.2702		59.8096					0.324	0.167	0.108	0.543	3.52451		2.09598		236.142					0.414	0.209	0.2	0.629	4.50061		2.42794		301.541
	0.02	0.01	0.01	0.01	0.2175		0.0386		14.5725					0.088	0.058	0.054	0.056	0.93726		0.21616		62.7964					0.313	0.159	0.109	0.537	3.40725		2.07282		228.286					0.413	0.2	0.198	0.625	4.50108		2.4125		301.572
					0.234142	0.0269352	0.033968	0.00503282	15.6875	1.80466								0.806832	0.209982	0.224652	0.0256625	54.0577	14.0688								3.50607	0.0718566	2.01183	0.0965926	234.907	4.81439								4.48888	0.054886	2.52367	0.0984641	300.755	3.67736
Day4	665nm	645nm	630nm	452nm	Chl a		carotenoid		Biomass				Day5	665nm	645nm	630nm	452nm	Chl a		carotenoid		Biomass				Day6	665nm	645nm	630nm	452nm	Chl a		carotenoid		Biomass				Day7	665nm	645nm	630nm	452nm	Chl a		carotenoid		Biomass
diatom	0.202	0.055	0.059	0.334	2.26289		1.28924		151.614		0.778028		diatom	0.221	0.058	0.065	0.626	2.47852		2.41636		166.061				diatom	0.207	0.052	0.058	0.558	2.32496		2.15388		155.772				diatom	0.145	0.064	0.073	0.347	1.58794		1.33942		106.392
	0.2	0.053	0.057	0.338	2.24259		1.30468		150.254		0.833852			0.222	0.059	0.065	0.626	2.48881		2.41636		166.75					0.205	0.049	0.056	0.558	2.30597		2.15388		154.5					0.148	0.066	0.074	0.342	1.61998		1.32012		108.539
	0.196	0.055	0.059	0.335	2.19329		1.2931		146.95		0.848151			0.235	0.07	0.073	0.624	2.62408		2.40864		175.813					0.196	0.069	0.067	0.557	2.17383		2.15002		145.647					0.163	0.055	0.38	0.341	1.76555		1.31626		118.292
	0.205	0.06	0.064	0.335	2.29044		1.2931		153.459		0.938916			0.225	0.056	0.06	0.613	2.52824		2.36618		169.392					0.199	0.067	0.065	0.513	2.21153		1.98018		148.173					0.145	0.042	0.045	0.331	1.62068		1.27766		108.586
	0.2	0.057	0.059	0.333	2.23707		1.28538		149.884		0.913409			0.225	0.0563	0.059	0.619	2.52799		2.38934		169.375					0.2	0.05	0.053	0.501	2.24708		1.93386		150.554					0.154	0.067	0.068	0.334	1.68911		1.28924		113.17
					2.24526	0.035802	1.2931	0.0072214	150.432	2.39873	0.862471	0.0644075						2.52953	0.0574541	2.39938	0.0215953	169.478	3.84942								2.25267	0.0729546	2.07436	0.0862259	150.929	4.88796								1.65665	0.0711907	1.30854	0.0248663	110.996	4.76978
Cir1	0.119	0.064	0.069	0.418	1.2869		1.61348		86.2223				Cir1	0.164	0.049	0.044	0.479	1.83205		1.84894		122.747				Cir1	0.303	0.102	0.098	0.744	3.36746		2.87184		225.62		0.608723		Cir1	0.194	0.062	0.061	0.523	2.16064		2.01878		144.763
	0.12	0.066	0.06	0.419	1.29714		1.61734		86.9084					0.166	0.058	0.052	0.489	1.84234		1.88754		123.437					0.304	0.142	0.142	0.795	3.3205		3.0687		222.473		0.589079			0.193	0.062	0.06	0.525	2.14918		2.0265		143.995
	0.126	0.062	0.069	0.438	1.37072		1.69068		91.8382					0.179	0.061	0.063	0.463	1.98767		1.78718		133.174					0.293	0.019	0.015	0.793	3.37181		3.06098		225.911		0.528487			0.199	0.068	0.063	0.521	2.2105		2.01106		148.103
	0.133	0.062	0.066	0.438	1.45234		1.69068		97.3068					0.177	0.06	0.063	0.473	1.96578		1.82578		131.707					0.294	0.02	0.016	0.794	3.38196		3.06484		226.591		0.542566			0.199	0.068	0.062	0.529	2.21064		2.04194		148.113
	0.129	0.056	0.056	0.429	1.4152		1.65594		94.8184					0.173	0.076	0.076	0.477	1.8966		1.84122		127.072					0.31	0.102	0.109	0.738	3.44712		2.84868		230.957		0.597476			0.201	0.052	0.049	0.525	2.25662		2.0265		151.194
					1.36446	0.0722568	1.65362	0.037682	91.4188	4.8412								1.90489	0.0704397	1.83813	0.0364561	127.627	4.71946								3.37777	0.045411	2.98301	0.112385	226.311	3.04254	0.573266	0.0355002						2.19752	0.0433887	2.02496	0.0114506	147.234	2.90704
Cir2	0.755	0.587	0.237	1.432	7.95585		5.52752		533.042		0.558277		Cir2	0.844	0.438	0.205	1.528	9.18792		5.89808		615.591				Cir2	1.007	0.449	0.212	1.752	11.0633		6.76272		741.243				Cir2	1.033	0.526	0.254	2.129	11.2582		8.21794		754.298
	0.762	0.593	0.245	1.435	8.02807		5.5391		537.881		0.581198			0.837	0.527	0.29	1.523	8.97823		5.87878		601.541					1.008	0.446	0.212	1.757	11.0789		6.78202		742.284					1.031	0.529	0.225	2.112	11.2351		8.15232		752.752
	0.74	0.421	0.217	1.487	8.00211		5.73982		536.141		0.597898			0.84	0.408	0.192	1.49	9.18264		5.7514		615.237					1.018	0.52	0.244	1.804	11.0934		6.96344		743.26					1.025	0.317	0.148	2.128	11.454		8.21408		767.419
	0.742	0.429	0.218	1.438	8.01469		5.55068		536.984		0.577063			0.842	0.409	0.192	1.483	9.20453		5.72438		616.704					1.02	0.522	0.244	1.804	11.114		6.96344		744.639					1.011	0.309	0.146	2.108	11.3024		8.13688		757.259
	0.754	0.581	0.325	1.437	7.93979		5.54682		531.966		0.567569			0.835	0.417	0.288	1.533	9.09941		5.91738		609.66					1.009	0.521	0.549	1.794	10.945		6.92484		733.317					1.021	0.402	0.323	2.1	11.2718		8.106		755.208
					7.9881	0.0383237	5.58079	0.0893404	535.203	2.56769	0.576401	0.0149337						9.13055	0.0944045	5.834	0.0893071	611.747	6.3251								11.0874	0.0663619	6.86791	0.0991051	742.857	4.44625								11.3043	0.0871636	8.16544	0.0490994	757.387	5.83996
Day8	665nm	645nm	630nm	452nm	Chl a		carotenoid		Biomass
diatom	0.142	0.054	0.053	0.307	1.56904		1.18502		105.126
	0.144	0.056	0.044	0.302	1.59088		1.16572		106.589
	0.153	0.045	0.38	0.301	1.66265		1.16186		111.398
	0.145	0.042	0.04	0.301	1.62138		1.16186		108.632
	0.147	0.05	0.054	0.304	1.63214		1.17344		109.353
Cir1					1.61522	0.0363967	1.16958	0.00984111	108.22	2.43858
	0.119	0.035	0.015	0.476	1.33245		1.83736		89.2741
	0.109	0.025	0.018	0.503	1.22913		1.94158		82.3517
	0.105	0.022	0.025	0.509	1.18568		1.96474		79.4406
	0.111	0.023	0.027	0.499	1.25369		1.92614		83.9972
					1.32323	0.171721	1.76788	0.337921	88.6567	11.5053
Cir2	0.546	0.28	0.132	1.112	5.94832		4.29232		398.537
	0.546	0.267	0.128	1.106	5.96591		4.26916		399.716
	0.543	0.277	0.129	1.121	5.91787		4.32706		396.497
	0.556	0.278	0.13	1.128	6.06722		4.35408		406.504
	0.555	0.277	0.139	1.108	6.05567		4.27688		405.73
					5.991	0.0666911	4.3039	0.0357962	401.397	4.4683
[truncated: 1 more columns]

## Sheet: Chl a
Diatom	Axenic		Co-culture										Day 4	Day3			Day 2	Day 1
Day	Chl a	STD	Chl a	STD									0.79867	0.29	1.01307		0.72631	0.17835	1.40423
0	0.17704	0.023362	0.156656	0.0810788									0.78267	0.3132	0.915869		0.725	0.23649	1.12027
1	0.183752	0.0364337	0.19053	0.0350033									0.76256	0.23911	1.15976		0.6257	0.16516	1.33196
2	0.280682	0.0901987	0.664044	0.0573923									0.63379	0.28144	0.811798		0.60563	0.15501	1.36278
3	0.292002	0.0364735	0.949152	0.0599971									0.61059	0.33626	0.596541		0.63758	0.21764	1.07484
4	0.717656	0.0884634	2.24526	0.035802											0.899407				1.25881
5	1.10818	0.0510856	2.52953	0.0574541
6	2.33594	0.0461436	2.25267	0.0729546
7	1.42413	0.088509	1.65665	0.0711907
8	0.656067	0.0722228	1.61522	0.0363967
Cir 1	Axenic		Co-culture
Day	Chl a	STD	Chl a	STD
0	0.136804	0.032394	0.121968	0.0242343									Day 4	Day 3			Day2	Day1
1	0.370732	0.0923541	0.41745	0.0458858									0.9019	0.29	0.850967		0.97342	0.46124	0.746897
2	0.538268	0.11909	0.932752	0.0792299									0.89329	0.3132	0.786052		0.949	0.34089	1.02385
3	0.621516	0.159155	1.06886	0.0908685									0.87987	0.23911	0.977138		0.96467	0.43673	0.792471
4	0.912724	0.0304257	1.36446	0.0722568									0.936	0.28144	0.901272		0.9838	0.43369	0.819093
5	1.3659	0.0590183	1.90489	0.0704397									0.95256	0.33626	0.780951		0.79287	0.4147	0.648104
6	2.22223	0.0542942	3.37777	0.045411											0.859276				0.806083
7	3.3786	0.0765864	2.19752	0.0433887
8	2.06233	0.082567	1.26902	0.0678964
Cir 2	Axenic		Co-culture
Day	Chl a	STD	Chl a	STD
0	0.263488	0.0424713	0.234142	0.0269352
1	0.242822	0.067781	0.806832	0.209982
2	0.362602	0.0486934	3.50607	0.0718566
3	0.587726	0.0744264	4.48888	0.054886									Day 4	Day 3			Day2	Day1
4	1.05582	0.108557	7.9881	0.0383237									1.1854	0.61241	0.495325		3.46238	0.57892	1.78855
5	2.03847	0.0440636	9.13055	0.0944045									1.04498	0.65582	0.3494		3.58981	0.58907	1.80731
6	4.6005	0.093226	11.0874	0.0663619									0.89091	0.6177	0.27468		3.5464	1.03623	1.23034
7	5.90923	0.153662	11.3043	0.0871636									1.04751	0.46124	0.61519		3.52451	0.89268	1.37327
8	7.24642	0.0492847	5.991	0.0666911									1.11028	0.59146	0.47233		3.40725	0.93726	1.2907
															0.441385				1.49803
*Pure culture exponential phase of all species determine at day 5
*Co-culture exponential phase of all species determined at day 4
One-way ANOVA: Diatom, Diatom+Bacillus
Source	DF	SS	MS	F	P
Factor	1	1.081	1.081	1.4	0.256
Error	14	10.118	0.843
Total	15	11.199
One-way ANOVA: Cir 1, Cir 1+Bacillus
Source	DF	SS	MS	F	P
Factor	1	0.21	0.21	0.06	0.815
Error	16	16.23	1.16
Total	17	16.44
One-way ANOVA: Cir 2, Cir 2+Bacillus
Source	DF	SS	MS	F	P
Factor	1	57.7	57.7	4.72	0.045
Error	16	195.7	12.2
Total	17	153.4

## Sheet: Carotenoid
	Pure		Co-culture
Day	carotenoid	STD	carotenoid	STD
0	0.066392	0.0269372	0.060988	0.0137559
1	0.08878	0.0329799	0.155944	0.0190279
2	0.126608	0.0379578	0.408388	0.0157741
3	0.074112	0.0126264	0.736488	0.0247763
4	0.35126	0.0485962	1.2931	0.0072214
5	1.31626	0.132539	2.39938	0.0215953
6	2.24073	0.187213	2.07436	0.0862259
7	1.37609	0.188324	1.30854	0.0248663
8	0.659095	0.088605	1.16958	0.00984111
	Pure		Co-culture
Day	carotenoid	STD	carotenoid	STD
0	0.067936	0.0188311	0.050952	0.0201313
1	0.270972	0.0631555	0.149768	0.0499121
2	0.139732	0.0126264	0.303396	0.0287045
3	0.184508	0.0240128	0.829128	0.00742486
4	0.287184	0.0343735	1.65362	0.037682
5	0.415336	0.00440108	1.83813	0.0364561
6	1.20818	0.0225075	2.98301	0.112385
7	1.682	0.0590782	2.02496	0.0114506
8	1.52277	0.00668572	1.9107	0.0505498
	Pure		Co-culture
Day	carotenoid	STD	carotenoid	STD
0	0.105764	0.0135375	0.033968	0.00503282
1	0.06176	0.0141825	0.224652	0.0256625
2	0.156716	0.00645902	2.01183	0.0965926
3	0.251672	0.0943294	2.52367	0.0984641
4	0.573596	0.0575516	5.58079	0.0893404
5	1.75784	0.0328214	5.834	0.0893071
6	1.72831	0.0484554	6.86791	0.0991051
7	3.74902	0.0729921	8.16544	0.0490994
8	4.52392	0.0974984	4.3039	0.0357962
One-way ANOVA: Diatom, Diatom+Bacillus
Source	DF	SS	MS	F	P
Factor	1	0.682	0.682	2.74	0.12
Error	14	3.455	0.288
Total	15	4.137
One-way ANOVA: Cir 1, Cir 1+Bacillus
Source	DF	SS	MS	F	P
Factor	1	1.932	1.932	2.73	0.118
Error	16	10.227	0.731
Total	17	12.159
One-way ANOVA: Cir 2, Cir 2+Bacillus
Source	DF	SS	MS	F	P
Factor	1	28.43	28.43	5.04	0.039
Error	16	90.23	5.64
Total	17	118.66

## Sheet: SGR+BP
	PURE CULTURE: SPECIFIC GROWTH RATE
	0	1	2	3	4	5	6	7	8
T.	0.14369	0.29641	0.17082	0.29	0.79867	1.15808	2.33455	1.43639	0.70283
weissflogii	0.16558	0.15384	0.22751	0.23911	0.78267	1.03193	2.33455	1.33615	0.71878
	0.20314	0.3364	0.30202	0.3132	0.76256	1.08937	2.39381	1.54182	0.55928
	0.19285	0.1972	0.29173	0.28144	0.63379	1.11126	2.28085	1.38218	0.64338
	0.17994	0.24533	0.41133	0.33626	0.61059	1.15027
	0.17601	0.37976	0.52345	0.38261	0.9019	1.37993	2.16817	3.3197	2.0438
Chlamydo	0.15426	0.21025	0.37293	0.6032	0.89329	1.37694	2.24895	3.30787	2.17364
	0.137	0.44094	0.70891	0.68875	0.87987	1.2782	2.28506	3.46241	1.97462
	0.08915	0.41643	0.54085	0.61321	0.936	1.44172	2.18674	3.42443	2.05727
	0.1276	0.40628	0.5452	0.81981	0.95256	1.35271
	0.24388	0.13471	0.42139	0.61241	1.1854	2.00263	4.53705	5.87357	7.22097
C.vulgaris	0.293439	0.29608	0.34145	0.65582	1.04498	2.09674	4.71016	6.00603	7.18969
	0.2704	0.2711	0.29229	0.6177	0.89091	2.02705	4.6443	6.04943	7.29217
	0.23995	0.29285	0.38612	0.46124	1.04751	2.07102	4.51048	5.70789	7.28286
	0.22882	0.21937	0.37176	0.59146	1.11028	1.99492
Co-culture		CO-CULTURE:SPECIFIC GROWTH RATE
	0	1	2	3	4	5	6	7	8
T.	0.27391	0.17835	0.72631	1.03937	2.26289	2.47852	2.32496	1.58794	1.56904
weissflogii	0.20155	0.23649	0.725	0.97412	2.24259	2.48881	2.30597	1.61998	1.59088
	0.06829	0.16516	0.6257	0.93918	2.19329	2.62408	2.17383	1.76555	1.66265
	0.11918	0.15501	0.60563	0.89568	2.29044	2.52824	2.21153	1.62068	1.62138
	0.12035	0.21764	0.63758	0.89741	2.23707	2.52799	2.24708	1.68911	1.63214
	0.1624	0.46124	0.97342	1.02852	1.2869	1.83205	3.36746	2.16064	1.33245
Chlamydo	0.10309	0.34089	0.949	1.1578	1.29714	1.84234	3.3205	2.14918	1.22913
	0.11483	0.43673	0.96467	1.04423	1.37072	1.98767	3.37181	2.2105	1.18568
	0.10468	0.43369	0.9838	1.16318	1.45234	1.96578	3.38196	2.21064	1.25369
	0.12484	0.4147	0.79287	0.95059	1.4152	1.8966	3.44712	2.25662
	0.20618	0.57892	3.46238	4.55229	7.95585	9.18792	11.0633	11.2582	5.94832
C.vulgaris	0.22807	0.58907	3.58981	4.48952	8.02807	8.97823	11.0789	11.2351	5.96591
	0.24332	1.03623	3.5464	4.40089	8.00211	9.18264	11.0934	11.454	5.91787
	0.27564	0.89268	3.52451	4.50061	8.01469	9.20453	11.114	11.3024	6.06722
	0.2175	0.93726	3.40725	4.50108	7.93979	9.09941	10.945	11.2718	6.05567
		PURE: BIOMASS PRODUCTIVITY
	0	1	2	3	4	5	6	7
T.	9.62723	19.8595	11.4449	19.43	53.5109	77.5914	156.415	96.2381
weissflogii	11.0939	10.3073	15.2432	20.9844	52.4389	69.1393	156.415	89.522
	13.6104	22.5388	20.2353	16.0204	51.0915	72.9878	160.385	103.302
	12.9209	13.2124	19.5459	18.8565	42.4639	74.4544	152.817	92.6061
	12.056	16.4371	27.5591	22.5294	40.9095	77.0681
	11.7927	25.4439	35.0711	25.6349	60.4273	92.4553	145.267	222.42
Chlamydo	10.3354	14.0868	24.9863	40.4144	59.8504	92.255	150.68	221.627
	9.179	29.543	47.497	46.1462	58.9513	85.6394	153.099	231.981
	5.97305	27.9008	36.237	41.0851	62.712	96.5952	146.512	229.437
	8.5492	27.2208	36.5284	54.9273	63.8215	90.6316
	16.34	9.02557	28.2331	41.0315	79.4218	134.176	303.982	393.529
C.vulgaris	22.4041	19.621	22.8771	43.9399	70.0137	140.482	315.581	402.404
	18.1168	18.1637	19.5834	41.3859	59.691	135.812	311.168	405.312
	16.0766	19.8374	25.87	30.9031	70.1832	138.758	302.202	382.429
	15.3309	14.6978	24.9079	39.6278	74.3888	133.66
		COCULTURE: BIOMASS PRODUCTIVITY
	0	1	2	3	4	5	6	7
T.	18.352	11.9494	48.6628	69.6378	151.614	166.061	155.772	106.392
weissflogii	13.5038	15.8448	48.575	65.266	150.254	166.75	154.5	108.539
	4.57543	11.0657	41.9219	62.9251	146.95	175.813	145.647	118.292
	7.98506	10.3857	40.5772	60.0106	153.459	169.392	148.173	108.586
	8.06345	14.5819	42.7179	60.1265	149.884	169.375	150.554	113.17
	0	1	2	3	4	5	6	7
	10.8808	30.9031	65.2191	68.9108	86.2223	122.747	225.62	144.763
Chlamydo	6.90703	22.8396	63.583	77.5726	86.9084	123.437	222.473	143.995
	7.69361	29.2609	64.6329	69.9634	91.8382	133.174	225.911	148.103
	7.01356	29.0572	65.9146	77.9331	97.3068	131.707	226.591	148.113
	8.36428	27.7849	53.1223	63.6895	94.8184	127.072	230.957	151.194
	0	1	2	3	4	5	6	7
	13.8141	38.7876	231.979	305.003	533.042	615.591	741.243	754.298
C.vulgaris	15.2807	39.4677	240.517	300.798	537.881	601.541	742.284	752.752
	16.3024	69.4274	237.609	294.86	536.141	615.237	743.26	767.419
	18.4679	59.8096	236.142	301.541	536.984	616.704	744.639	757.259
	14.5725	62.7964	228.286	301.572	531.966	609.66	733.317	755.208

## Sheet: GR-not significant
Pure	Day 0	stationary	growth rate	SD	Co-culture	day 0	stationary	growth rate	SD
Diatom	0.14369	2.33455	1.15808			0.27391	2.47852	0.367103
	0.16558	2.33455	1.03193			0.20155	2.48881	0.41892
	0.20314	2.39381	1.08937			0.06829	2.62408	0.60812
	0.19285	2.28085	1.11126			0.11918	2.52824	0.509107
			1.15027	0.05236		0.12035	2.52799	0.475813	0.105938
CIR 1	0.17601	3.3197	0.419584			0.1624	3.36746	0.505309
	0.15426	3.30787	0.437917			0.10309	3.3205	0.578711
	0.137	3.46241	0.461391			0.11483	3.37181	0.563292
	0.08915	3.42443	0.521196			0.10468	3.38196	0.579217
			0.460022	0.0442265		0.12484	3.44712	0.556632	0.0350049
CIR 2	0.24388	7.22097	0.423509			0.20618	11.2582	0.666683
	0.33439	7.18969	0.383512			0.22807	11.2351	0.649524
	0.2704	7.29217	0.411832			0.24332	11.454	0.641953
	0.23995	7.28286	0.426606			0.27564	11.3024	0.618945
			0.411365	0.0196279		0.2175	11.2718	0.644277	0.0198047
specific growth rate		day	rate	SD			specific rate (based on Chl a)
	pure						pure	before	after	rate	SD	co-culture	before	after	rate	SD
	DIA	4&3	0.449703	0.106176				0.29	0.79867	0.506533			0.17835	0.72631	0.702115
	CIR 1	5&3	0.272143	0.0997085			DIA	0.3132	0.78267	0.457935			0.23649	0.725	0.560133
	CIR 2	5&3	0.41687	0.0472476				0.23911	0.76256	0.579879			0.16516	0.6257	0.665978
								0.28144	0.63379	0.405899			0.15501	0.60563	0.68139
	co-culture							0.33626	0.61059	0.298271			0.21764	0.63758	0.537419
	DIA	2&1	0.629407	0.0751445						0.449703	0.106176				0.629407	0.0751445
	CIR 1	1&0	0.619762	0.0724884				0.38261	1.37993	0.427591			0.1624	0.46124	0.521928
	CIR 2	2&0	0.903756	0.0346466			CIR 1	0.6032	1.37694	0.275123			0.10309	0.34089	0.597979
								0.68875	1.2782				0.11483	0.43673	0.667931
								0.61321	1.44172	0.284962			0.10468	0.43369	0.710711
								0.81981	1.35271				0.12484	0.4147	0.600261
										0.329225	0.0853289				0.619762	0.0724884
								0.61241	2.00263	0.394938			0.20618	3.46238	0.94032
							CIR 2	0.65582	2.09674	0.387418			0.22807	3.58981	0.918734
								0.6177	2.02705	0.396111			0.24332	3.5464	0.893104
								0.46124	2.07102	0.500626			0.27564	3.52451	0.849467
								0.59146	1.99492	0.405255			0.2175	3.40725	0.917154
										0.41687	0.0472476				0.903756	0.0346466
							DIA
							DF	F	P
							1	9.5	0.015
							8
							9
							CIR 1
							DF	F	P
							1	39.43	0.003
							8
							9
							CIR 2
							DF	F	P
							1	347.35	0.005
							8
							9
